## Whole-Genome Association Analyses of Sleep-disordered Breathing Phenotypes in the NHLBI TOPMed Program

Brian E. Cade<sup>1,2,3\*</sup>, Jiwon Lee<sup>1</sup>, Tamar Sofer<sup>1,2</sup>, Heming Wang<sup>1,2,3</sup>, Man Zhang<sup>4</sup>, Han Chen<sup>5,6</sup>, Sina A. Gharib<sup>7</sup>, Daniel J. Gottlieb<sup>1,2,8</sup>, Xiuqing Guo<sup>9</sup>, Jacqueline M. Lane<sup>1,2,3,10</sup>, Jingjing Liang<sup>11</sup>, Xihong Lin<sup>12</sup>, Hao Mei<sup>13</sup>, Sanjay R. Patel<sup>14</sup>, Shaun M. Purcell<sup>1,2,3</sup>, Richa Saxena<sup>1,2,3,10</sup>, Neomi A. Shah<sup>15</sup>, Daniel S. Evans<sup>16</sup>, Craig L. Hanis<sup>5</sup>, David R. Hillman<sup>17</sup>, Sutapa Mukherjee<sup>18,19</sup>, Lyle J. Palmer<sup>20</sup>, Katie L. Stone<sup>16</sup>, Gregory J. Tranah<sup>16</sup>, NHLBI Trans-Omics for Precision Medicine (TOPMed) Consortium\*\*, Gonçalo R. Abecasis<sup>21</sup>, Eric A. Boerwinkle<sup>5,22</sup>, Adolfo Correa<sup>23,24</sup>, L. Adrienne Cupples<sup>25,26</sup>, Robert C. Kaplan<sup>27</sup>, Deborah A. Nickerson<sup>28,29</sup>, Kari E. North<sup>30</sup>, Bruce M. Psaty<sup>31,32</sup>, Jerome I. Rotter<sup>9</sup>, Stephen S. Rich<sup>33</sup>, Russell P. Tracy<sup>34</sup>, Ramachandran S. Vasan<sup>26,35,36</sup>, James G. Wilson<sup>37</sup>, Xiaofeng Zhu<sup>11</sup>, Susan Redline<sup>1,2,38</sup>, TOPMed Sleep Working Group\*\*

1. Division of Sleep and Circadian Disorders, Brigham and Women's Hospital, Boston, MA 02115, USA
2. Division of Sleep Medicine, Harvard Medical School, Boston, MA 02115, USA
3. Program in Medical and Population Genetics, Broad Institute, Cambridge, MA 02142, USA
4. Department of Medicine, University of Maryland School of Medicine, Baltimore, MD 21201
5. Human Genetics Center, Department of Epidemiology, Human Genetics and Environmental Sciences, School of Public Health, The University of Texas Health Science Center at Houston, Houston, TX 77030 USA
6. Center for Precision Health, School of Public Health and School of Biomedical Informatics, The University of Texas Health Science Center at Houston, Houston, TX 77030, USA
7. Computational Medicine Core, Center for Lung Biology, UW Medicine Sleep Center, Division of Pulmonary, Critical Care and Sleep Medicine, University of Washington, Seattle WA 98195, USA
8. VA Boston Healthcare System, Boston, MA 02132, USA
9. The Institute for Translational Genomics and Population Sciences, Departments of Pediatrics and Medicine, LABioMed at Harbor-UCLA Medical Center, Torrance, CA 90502, USA
10. Center for Genomic Medicine and Department of Anesthesia, Pain, and Critical Care Medicine, Massachusetts General Hospital, Boston, MA 02114, USA
11. Department of Population and Quantitative Health Sciences, School of Medicine, Case Western Reserve University, Cleveland, OH 44106, USA
12. Department of Biostatistics, Harvard T.H. Chan School of Public Health, Boston, MA 02115, USA
13. Department of Data Science, University of Mississippi Medical Center, Jackson, MS 29216, USA
14. Division of Pulmonary, Allergy, and Critical Care Medicine, University of Pittsburgh, Pittsburgh, PA 15213, USA
15. Division of Pulmonary, Critical Care and Sleep Medicine, Icahn School of Medicine at Mount Sinai, New York, NY 10029, USA

16. California Pacific Medical Center Research Institute, San Francisco, CA 94107, USA
17. Department of Pulmonary Physiology and Sleep Medicine, Sir Charles Gairdner Hospital, Perth, Western Australia 6009, Australia
18. Sleep Health Service, Respiratory and Sleep Services, Southern Adelaide Local Health Network, Adelaide, South Australia
19. Adelaide Institute for Sleep Health, Flinders University, Adelaide, South Australia
20. School of Public Health, University of Adelaide, South Australia 5000, Australia
21. Department of Biostatistics and Center for Statistical Genetics, University of Michigan School of Public Health, Ann Arbor, MI 48109, USA
22. Human Genome Sequencing Center, Baylor College of Medicine, Houston, TX 77030, USA
23. Department of Medicine, University of Mississippi Medical Center, Jackson, MS 39216, USA
24. Jackson Heart Study, Jackson, MS 39216, USA
25. Department of Biostatistics, Boston University School of Public Health, Boston, MA 02118, USA
26. Framingham Heart Study, Framingham, MA 01702, USA
27. Department of Epidemiology and Population Health, Albert Einstein College of Medicine, Bronx, New York 10461, USA
28. Department of Genome Sciences, University of Washington, Seattle, WA 98195
29. Northwest Genomics Center, Seattle, WA 98105
30. Department of Epidemiology and Carolina Center of Genome Sciences, University of North Carolina, Chapel Hill, NC 27514, USA
31. Cardiovascular Health Study, Departments of Medicine, Epidemiology, and Health Services, University of Washington, Seattle, WA 98101, USA
32. Kaiser Permanente Washington Health Research Institute, Seattle, WA 98101, USA
33. Center for Public Health Genomics, University of Virginia, Charlottesville, VA 22908, USA
34. Department of Pathology, University of Vermont, Colchester, VT 05405, USA
35. Sections of Preventive Medicine and Epidemiology and Cardiology, Department of Medicine, Boston University School of Medicine, Boston, MA 02118, USA
36. Department of Epidemiology, Boston University School of Public Health, Boston, MA 02118, USA
37. Department of Physiology and Biophysics, University of Mississippi Medical Center, Jackson MS 39216, USA
38. Division of Pulmonary, Critical Care, and Sleep Medicine, Beth Israel Deaconess Medical Center, Boston, MA 02215, USA

\*: Please address all correspondence and requests for reprints to:

Brian Cade  
Division of Sleep and Circadian Disorders  
Brigham and Women's Hospital, Harvard Medical School  
221 Longwood Avenue, Boston, MA 02115, USA  
1-857-307-0353 (phone) 1-617-278-6946 (fax) [bcade@bwh.harvard.edu](mailto:bcade@bwh.harvard.edu) (e-mail)

\*\* : Full lists of consortium and working group authors are provided in **Supplementary Tables 1 and 2**.

Word count: 3,978

Table count: 6

Figure count: 2

Supplementary count: Tables 13/Figures 5

**Cade *et al.*: WGS analyses of sleep-disordered breathing**

1 **Abstract**

2 Sleep-disordered breathing (SDB) is a common disorder associated with significant morbidity. Through  
3 the NHLBI Trans-Omics for Precision Medicine (TOPMed) program we report the first whole-genome sequence  
4 analysis of SDB. We identified 4 rare gene-based associations with SDB traits in 7,988 individuals of diverse  
5 ancestry and 4 replicated common variant associations with inclusion of additional samples (n=13,257). We  
6 identified a multi-ethnic set-based rare-variant association ( $p = 3.48 \times 10^{-8}$ ) on chromosome X with *ARMCX3*.  
7 Transcription factor binding site enrichment identified associations with genes implicated with respiratory and  
8 craniofacial traits. Results highlighted associations in genes that modulate lung development, inflammation,  
9 respiratory rhythmogenesis and *HIF1A*-mediated hypoxic response.

## Cade *et al.*: WGS analyses of sleep-disordered breathing

### 10 **Introduction**

11 Sleep-disordered breathing (SDB) is a prevalent disorder associated with increased mortality and  
12 morbidity [1-4]. The most common type of SDB is obstructive sleep apnea (OSA), characterized by repeated  
13 airway collapse leading to intermittent hypoxemia and sleep disruption, that is increased in prevalence with older  
14 age and male sex [5]. The disease appears to be multifactorial, reflecting variable contributions of abnormalities in  
15 ventilatory control, craniofacial anatomy, and adiposity [5-11]. Due to an incomplete understanding of its  
16 pathophysiology, standard OSA treatment only addresses the downstream manifestations of airway collapse  
17 through nightly use of pressurized air to the nasopharynx, a therapy that often is poorly tolerated. Therefore, there  
18 is a critical need to identify molecular pathways that could provide specific therapeutic targets. The need for  
19 overnight studies to phenotype SDB traits has limited the available sample size for genetic analyses, and only  
20 several common-frequency genome-wide analysis studies have been reported [11-15]. Increased statistical power  
21 may increase the genetic resolution of regions that may not be adequately tagged by current genotyping arrays due  
22 to population differences and/or reduced linkage disequilibrium with biologically relevant regions [16].

23 The Trans-Omics for Precision Medicine (TOPMed) program is an NIH National Heart, Lung, and Blood  
24 Institute program designed to improve the understanding of the biological processes that contribute to heart, lung,  
25 blood, and sleep disorders [17]. TOPMed has generated whole-genome sequencing (WGS) data on over 100,000  
26 individuals from multiple cohorts at >30× depth, including seven studies with objective assessment of SDB. A  
27 variant imputation server using TOPMed data also allows for high-quality imputation of non-sequenced genotype  
28 chip data [18]. A complementary initiative sponsored by the Centers for Common Disease Genomics (CCDG) of  
29 the NIH National Human Genome Research Institute has generated sequencing data from additional individuals in  
30 two TOPMed cohorts (<https://www.genome.gov/27563570>). These initiatives provide the ability to examine the  
31 genetics of SDB at unprecedented detail in African-Americans (AA), Asian-Americans (AsA), European-  
32 Americans/Australians (EA), and Hispanic/Latino-Americans (HA).

33 In this first WGS analysis of SDB, we examine the apnea-hypopnea index (AHI), the standard clinic  
34 metric of SDB, and four complementary measurements of overnight hypoxemia: average and minimum  
35 oxyhemoglobin saturation (SpO<sub>2</sub>) during sleep and the percent of the sleep recording with SpO<sub>2</sub> < 90% (Per90);  
36 and the average desaturation per hypopnea event. These indices were chosen because of clinical relevance, high  
37 heritability, or prior significant GWAS findings [7-9,11,14]. We examined 7,988 individuals with objectively  
38 measured SDB and WGS data in conjunction with data from 13,257 individuals with imputed genotype data.

## Cade *et al.*: WGS analyses of sleep-disordered breathing

### 39 **Methods**

40 Each study had a protocol approved by its respective Institutional Review Board and participants  
41 provided informed consent. A study overview is provided in **Supplementary Figure 1**. There were two classes of  
42 data: “WGS studies” had WGS performed by the TOPMed program and, in some cases, in additional participants  
43 by the CCDG program (referred to as “WGS” studies); “Imputed studies” had array-based genotyping later  
44 imputed using the TOPMed imputation server (as described below). Some studies with WGS contributed imputed  
45 study data from additional array-based genotyped individuals.

46

#### 47 *WGS studies*

48 The Atherosclerosis Risk in Communities Study (ARIC), the Cardiovascular Health Study (CHS), and the  
49 Framingham Heart Study Offspring Cohort (FHS) included individuals who participated in the Sleep Heart Health  
50 Study (SHHS), who underwent polysomnography (PSG) between 1995 – 1998 using the Compumedics PS-2  
51 system [19–22]. These samples included 1,028 EAs from ARIC; 151 AAs and 557 EAs from CHS; and 478 EAs  
52 from FHS.

53 The Multi-Ethnic Study of Atherosclerosis (MESA) is investigating the risk factors for clinical  
54 cardiovascular disease [23]. PSG was obtained between 2010 – 2013 using the Compumedics Somte system [24].  
55 This analysis includes data from 698 EAs, 486 AAs, 456 HAs, and 229 AsAs.

56 The Cleveland Family Study (CFS) was designed to investigate the familial basis of SDB, with four visits  
57 occurring from 1990 – 2006 [25]. Sleep was assessed either in a clinical research center using full PSG  
58 (Compumedics E series) (visit 4); or in the latest available prior examination using an in-home sleep apnea testing  
59 device (Edentrace). Data were analyzed from 505 AAs and 485 EAs (339 AAs and 234 EAs with full PSG data).

60 The Hispanic Community Health Study/Study of Latinos (HCHS/SOL) is studying multiple health  
61 conditions in HAs [26,27]. Home sleep apnea testing was performed during the baseline examination (2008 – 2011)  
62 using the ARES Unicorder 5.2, a validated device including a forehead-based reflectance oximeter, a nasal  
63 pressure cannula and pressure transducer, an accelerometer, and a microphone [28]. 2,339 individuals provided  
64 data.

65 The Jackson Heart Study (JHS) is investigating cardiovascular disease in AAs [29]. An in-home sleep  
66 study was performed from 2012 – 2016 using a validated Type 3 sleep apnea testing device (Embla Embletta  
67 Gold) [30,31]. 575 individuals contributed data.

68

#### 69 *Imputed genotype studies*

### **Cade *et al.*: WGS analyses of sleep-disordered breathing**

70 The Osteoporotic Fractures in Men Study (MrOS) is a multi-center cohort study initially designed to  
71 examine the risk factors for osteoporosis, fractures, and prostate cancer in older males [<sup>32,33</sup>]. An ancillary study  
72 (MrOS Sleep; 2003 – 2005) focused on outcomes of sleep disturbances used PSG and nearly identical procedures  
73 as in MESA (Compumedics Safiro system) [<sup>34</sup>]. 2,181 EA individuals were included, with genotyping performed  
74 using the Illumina Human Omni 1 Quad v1-0 H array.

75 The Starr County Health Studies (Starr) investigates the risk factors for diabetes in Mexican-Americans  
76 [<sup>35,36</sup>]. An in-home sleep apnea study occurred between 2010 and 2014 using a validated instrument that records  
77 finger pulse oximetry, actigraphy, body position, and peripheral arterial tonometry (Itamar-Medical WatchPAT-  
78 200) [<sup>37</sup>]. 782 HA individuals were studied, using Affymetrix 6.0 genotyping data.

79 The Western Australian Sleep Health Study (WASHS) is a clinic-based study focused on the  
80 epidemiology and genetics of SDB [<sup>38</sup>]. PSG was obtained from 1,508 European-ancestry patients (91% referred  
81 for SDB evaluation) from 2006 – 2010 (Compumedics Series E). Genotyping was performed using the Illumina  
82 Omni 2.5 array.

83 Imputed genotype data were available for additional members of the TOPMed cohorts described above.  
84 Study/population combinations with fewer than 100 individuals were excluded. ARIC contributed an additional  
85 631 EA individuals (Affymetrix 6.0; dbGaP phg000035.v1.p1). CFS contributed 225 AA and 218 EA individuals  
86 (Affymetrix 6.0; Illumina OmniExpress+Exome, Exome, and IBC). CHS contributed 365 individuals (Illumina  
87 CNV370 and IBC; phg000135.v1.p1 and phg000077.v1.p1). FHS contributed 192 EA individuals (Affymetrix  
88 500k; phg000006.v7). HCHS/SOL contributed 7,155 HA individuals (Illumina Omni 2.5; phg000663.v1).

89

### 90 *Phenotype and covariate definitions*

91 We examined several SDB measures, including specific measures of OSA: AHI (number of apneas plus  
92 hypopneas per hour of sleep, with a minimum 3% desaturation per event) and average oxyhemoglobin  
93 desaturation per apnea or hypopnea; and measures of SDB severity [<sup>7-9</sup>]: average and minimum SpO<sub>2</sub> and the  
94 percentage of the night with SpO<sub>2</sub> < 90% (Per90). Apart from WASHS, all sleep data were scored by blinded  
95 scorers at one central Sleep Reading Center with high levels of scorer reliability using well-defined procedures  
96 [<sup>39,40</sup>]. We adjusted for age, age<sup>2</sup>, sex, age × sex, body mass index (BMI), and BMI<sup>2</sup> due to known age and sex  
97 effects, some of which are non-linearly associated with outcomes, and our goal of identifying obesity-independent  
98 loci. Age and BMI were obtained at the time of the sleep recording. Phenotype analyses were pooled within  
99 populations to aggregate very rare variants for testing, and therefore further adjusted for study. Cryptic relatedness  
100 and population substructure were controlled for using linear mixed models. Genomic control was applied to  
101 population-specific results (or cohort-specific imputed genotype results).

## Cade *et al.*: WGS analyses of sleep-disordered breathing

102

### 103 *WGS and genotyping*

104 Sequence data were derived from the TOPMed Freeze 6a release, jointly called by the TOPMed  
105 Informatics Research Center at the University of Michigan ([http://github.com/statgen/topmed\\_variant\\_calling](http://github.com/statgen/topmed_variant_calling)).  
106 The methodology was described elsewhere [17]. In brief, WGS was performed at the Broad Institute (ARIC, FHS,  
107 MESA), Baylor College of Medicine (ARIC, CHS, HCHS/SOL), and the University of Washington (CFS, JHS).  
108 Additional ARIC and HCHS/SOL WGS funded by CCDG and performed at Baylor College of Medicine were  
109 included in the jointly-called data. TOPMed and CCDG calling pipelines have functionally equivalent outcomes  
110 despite data processing differences (as detailed in [41]). WGS data were merged and normalized; inferred sequence  
111 contamination was identified; and SNPs and small indels were detected (structural variants are not currently  
112 available). Lower quality variants were excluded using Mendelian consistency checks. Variants were aligned to  
113 Build 38 and annotated using snpEff 4.3t [42]. We excluded variants with  $<10\times$  depth or  $>5\%$  missingness, leaving  
114 152.7 million polymorphic variants in 7,988 individuals with SDB phenotypes.

115 Genotype data were imputed using the TOPMed Imputation Server [18] using a Freeze 5b (Build 38)  
116 template. Forward strand checks were performed using the Strand database and the Haplotype Reference  
117 Consortium imputation preparation script (<https://www.well.ox.ac.uk/~wrayner/tools/>) and confirmed using  
118 Ensembl variant allele checks and internal QC performed on the server. Study-level data were imputed separately.  
119 Analyses on variants with  $r^2$  score  $> 0.5$  were therefore performed separately for each study.

### 120 *Statistical analyses*

121 Single and grouped variant analyses were performed using EMMAX and MMSKAT, both within the  
122 EPACTS suite (v3.3, <https://genome.sph.umich.edu/wiki/EPACTS>) [43]. WGS genetic relatedness matrices  
123 (GRM) were constructed using autosomal variants (MAF  $> 0.1\%$ ) following a comparison of EPACTS point-wise  
124 heritability estimates of the AHI using different minimal MAFs. A grid search identified optimal GRM  
125 parameters with imputed data (MAF  $> 0.5\%$ ,  $r^2 > 0.90$ ) using 929 ARIC individuals with imputation and WGS  
126 data.  $\log_{10}$  P-values using identical association test parameters had a Spearman's  $\rho$  correlation of 0.951 between  
127 WGS and imputed data. Matrices were constructed separately for each study + population combination (due to  
128 potentially differential imputation coverage).

129 Gene-based group sets were constructed with a series of filters considering non-pseudogenes expressed in  
130 any GTEx v7 tissue. A variant could be assigned to one or more Ensembl genes based on SNPEff annotations  
131 [42,44]. We examined 5\_prime\_UTR\_premature\_start\_codon\_gain\_variant, bidirectional\_gene\_fusion,  
132 conservative\_inframe\_deletion, conservative\_inframe\_insertion, disruptive\_inframe\_deletion,  
133 disruptive\_inframe\_insertion, exon\_loss\_variant, frameshift\_variant, gene\_fusion, initiator\_codon\_variant,  
134 missense\_variant, non\_canonical\_start\_codon, splice\_acceptor\_variant, splice\_donor\_variant,



**Cade *et al.*: WGS analyses of sleep-disordered breathing**

135 splice\_region\_variant, start\_loss, stop\_gained, stop\_lost, and stop\_retained\_variant mutations. We also included  
136 variants located within experimentally derived promoter regions and Ensembl-derived Tarbase miRNA binding  
137 sites; and regulatory variants located within 1000 bases of a particular gene, including ChIP-seq determined  
138 transcription factor binding sites (TFBS), and Ensembl-derived CTCF, TFBS, and promoter sites [44-46]. Group set  
139 variants were filtered by requiring either a FATHMM-XF score > 0.5 or a CDTS < 1% constrained region score  
140 [47,48]. Exonic variants could alternatively have a PrimateAI score > 0.803 or a Havrilla *et al.* < 1% constrained  
141 coding region score [49,50].

142 Gene-based tests considered variants in WGS-only data (MAF < 5%). Pooled (across cohort) analyses  
143 were performed within each population in order to aggregate information on very rare variants across studies.  
144 Combined population results were obtained through meta-analysis of p-values weighted by sample size (due to  
145 potentially different MAF spectra driven by population demography). A significance level of  $p < 4.51 \times 10^{-8}$  was  
146 used, reflecting a Bonferroni adjustment for all genes tested across all phenotype and population configurations.

147 A second set-based analysis was designed to query for TFBS annotation enrichment [51]. We performed  
148 250 base-pair sliding window analyses (to improve power by aggregating additional variants beyond an  
149 approximate ChIP-seq peak width of 100 base-pairs). We filtered for variants with either a FATHMM-XF score >  
150 0.5 or a CDTS 1% score with no MAF cut-offs and meta-analyzed MMSKAT results across the 4 populations,  
151 noting windows with p-values < 0.01. These intervals were tested for enrichment of ChIP-seq coordinates with at  
152 least 50% physical overlap for up to 437 transcription factors using ReMap 2018 v1.2  
153 (<http://tagc.univ-mrs.fr/remap/index.php?page=annotation>) [52].

154 Single-variant EMMAX tests examined common variants (MAF > 0.5%). Meta-analysis across  
155 populations (and imputed genotype studies) used METAL with genomic control [53]. We performed bidirectional  
156 discovery and replication using the WGS and imputed samples (noting the high genomic resolution in the WGS  
157 samples and the higher sample size in the imputed data). We report results including at least 1000 individuals,  
158 discovery association p-values <  $1 \times 10^{-5}$  and replication association p-values < 0.05. Significance was defined as  
159  $p < 1 \times 10^{-8}$  in joint analyses, reflecting adjustment for five correlated phenotypes (Supplementary Table S3). We  
160 performed MetaXcan imputed GTEx gene expression analyses using joint EA results in selected tissues relevant  
161 to SDB and GIGSEA pathway analyses of MetaXcan output in whole blood (to maximize power), with empirical  
162 p-values incorporating 10,000 permutations [54,55].

163



## Cade *et al.*: WGS analyses of sleep-disordered breathing

### 164 **Results**

#### 165 Study sample

166 A study overview is provided in **Supplementary Figure 1. Tables 1 and 2** provide a summary of the  
167 study samples and SDB traits analyzed using WGS and imputed genotypes, respectively. In total, there were  
168 21,244 individuals (1,942 AAs; 229 AsAs; 8,341 EAs; and 10,732 HAs). Median AHI levels ranged from mildly  
169 to moderately elevated, reflecting the age range and sex distribution of each cohort. Pairwise correlations of  
170 phenotypes and covariates are provided in **Supplementary Table 3**.

171

#### 172 Gene-based results

173 Gene-based rare variant results are presented in **Table 3** (for meta-analyzed results across multiple  
174 populations) and in **Table 4** (for secondary population-specific results). Collectively, we identified 4 significantly  
175 associated genes (Bonferroni  $p < 4.51 \times 10^{-8}$ ). *ARMCX3*, identified in the multiple-population analysis, is an X-  
176 linked protein-coding that was associated with average desaturation ( $p = 5.29 \times 10^{-8}$ ). Two protein-coding genes  
177 were identified in population-specific analyses of Per90: *MRPS33* ( $p = 1.22 \times 10^{-9}$ ) and *C16orf90* ( $p = 1.36 \times 10^{-8}$ ).  
178 We identified 12 suggestively associated genes ( $p \leq 4.22 \times 10^{-7}$ ). Three genes are druggable [<sup>56,57</sup>]. Nominally  
179 significant results ( $p < 0.01$ ) and additional details are presented in **Supplementary Tables 4 and 5**.

180

#### 181 Single-variant results

182 We identified four genome-level significant loci in single-variant analyses ( $MAF > 0.5\%$ ;  $p < 1.0 \times 10^{-8}$ ;  
183 **Table 5**). In multiple-population analyses, the 2q12 locus (rs77375846; *IL18RAP*) was associated with average  
184 event desaturation in a multiple-population analysis (combined  $p = 1.57 \times 10^{-9}$ ) and minimum SpO<sub>2</sub> (consistent  
185 with a previous report [<sup>14</sup>]). Two novel population-specific loci were identified. The 8p12 locus (rs35447033,  
186 *NRG1*) was associated with AHI in EAs (combined  $p = 3.02 \times 10^{-9}$ , **Figure 1**). The 5p13 locus (rs28777;  
187 *SLC45A2*) was associated with average SpO<sub>2</sub> in EAs (combined  $p = 8.08 \times 10^{-10}$ , **Figure 2**). In HAs, the 1q32  
188 locus (rs116133558; *ATP2B4*) was associated with Per90 (combined  $p = 3.51 \times 10^{-10}$ ) and with average SpO<sub>2</sub> (as  
189 previously identified [<sup>11</sup>]). Twelve additional regions were suggestively associated ( $p < 1.0 \times 10^{-7}$ ).

190 **Supplementary Table 6** provides additional context for all variants in these loci ( $p < 1.0 \times 10^{-7}$ ), including  
191 imputation quality, significant eQTLs, and overlap with epigenetic regions [<sup>58-61</sup>]. Manhattan and QQ plots  
192 corresponding to the significant associations are provided in **Supplementary Figures 2 – 5**.

193

#### 194 MetaXcan imputed gene expression and GIGSEA pathway analyses

### **Cade *et al.*: WGS analyses of sleep-disordered breathing**

195 We used joint WGS and imputed EA results to impute associations with gene expression levels using a  
196 MetaXcan framework for 6 tissues (subcutaneous and visceral omentum adipose, lung, monocytes, skeletal  
197 muscle, and whole blood). No individual tests reached Bonferroni significance ( $p < 2.60 \times 10^{-7}$ ; **Supplementary**  
198 **Table 7**). Genes that were observed in the top 10 results across the varied analyses (**Supplementary Table 8**)  
199 included *ZNF83* (15 instances) and *CHRNE* (13 instances).

200 Whole blood MetaXcan results (with the largest sample size) were further evaluated in GIGSEA-based  
201 pathway analyses. KEGG pathway results are shown in **Supplementary Table 9**. The most significantly  
202 associated pathway was KEGG\_STEROID\_HORMONE\_BIOSYNTHESIS (average SpO<sub>2</sub> empirical p-value =  
203  $7.00 \times 10^{-4}$ ). KEGG\_RIG\_I\_LIKE\_RECEPTOR\_SIGNALING\_PATHWAY was observed in the top 10 results  
204 for 4 of the 5 phenotypes. Gene-centric transcription factor binding site (TFBS) enrichment analysis results are  
205 presented in **Supplementary Table 10**. V\$PEA3\_Q6 (*ETV4*) was the most significantly associated TFBS  
206 (average desaturation empirical p-value =  $3.00 \times 10^{-4}$ ) and was the strongest association for AHI and minimum  
207 SpO<sub>2</sub> (empirical p-values 0.002 and 0.001, respectively). The most significant miRNA binding site enrichment  
208 analysis association was GCATTTG,MIR-105 (average SpO<sub>2</sub> p = 0.002; **Supplementary Table 11**).  
209 AGGCACT,MIR-515-3P (the strongest AHI association, p = 0.009) was observed in the top ten results for four  
210 phenotypes.

211

### 212 *ChIP-seq transcription factor binding site interval enrichment*

213 We performed a sliding window analysis to examine enriched intervals containing ChIP-seq derived  
214 coordinates for up to 437 transcription factors (**Table 6, Supplementary Table 12**). *FOXP2* TFBS were  
215 consistently the most enriched for all phenotypes. Other notable transcription factors in the top 5 included *EGRI*,  
216 *KDM4B*, *KDM6B*, and *TP63*. *KDM4B* and *KDM6B* are druggable [<sup>56,57</sup>]. Leading sliding window results are  
217 provided in **Supplementary Table 13**.

218

**Cade *et al.*: WGS analyses of sleep-disordered breathing**

219 **Discussion**

220 Sleep-disordered breathing (SDB) is associated with increased risk of a wide range of disorders, including  
221 atrial fibrillation, cancer, cognitive impairment, diabetes, liver, and interstitial lung diseases, as well as premature  
222 mortality [3,4,62–67]. Treatment options, however, are limited by a lack of knowledge of molecular pathways,  
223 including those that may be “druggable”. Recent analyses of SDB traits have focused on common variants and  
224 identified several preliminary genome-level significant associations using GWAS, admixture mapping, and  
225 linkage approaches [11–15], but did not address gene-based or rare variant effects. Ten studies and over 21,000  
226 individuals of multiple ancestries with WGS data at unprecedented resolution from the NHLBI TOPMed program  
227 combined with densely imputed data from other sources contributed to these results. We identified several variant,  
228 gene-based, and pathway-level associations. Analyses adjusted for obesity, a major SDB risk factor, identified  
229 loci and genes implicated in pulmonary, inflammatory, and craniofacial pathways. Some associations were  
230 population-specific, while others were sex-specific, consistent with population differences and strong sex  
231 differences for SDB [24,68–70]. Notably, across multiple ancestral groups, we identified a set-based rare-variant  
232 association ( $p = 3.48 \times 10^{-8}$ ) on chromosome X with *ARMCX3*.

233

234 **Gene-based results**

235 Across multiple populations, *ARMCX3* (*ALEX3*) and the RNA anti-sense gene *ARMCX3-AS1* were  
236 associated with apnea-hypopnea triggered intermittent hypoxia. *ARMCX3* regulates mitochondrial aggregation  
237 and trafficking in multiple tissues and facilitates neuronal survival and axon regeneration [71–73]. Wnt signaling  
238 regulates reactive oxygen species (ROS) generation and *ARMCX3*-associated mitochondrial aggregation [72,74].  
239 Potential mechanisms for further study include sensitized carotid body chemoreflexes, interaction with  
240 inflammatory mechanisms, and neuronal dysfunction within respiratory centers. Sleep apnea and reduced  
241 ventilatory drive are enriched in individuals with a primary mitochondrial disorder [75]. Mitochondria are an  
242 important source of ROS, which modulate the acute hypoxic ventilatory response. Mitochondria impact *HIF1A*  
243 signaling and may contribute to oxygen sensing [76–79]. ROS are required for intermittent hypoxia-induced  
244 respiratory long-term facilitation [80,81]. These effects may mitigate the level of hypoxia resulting from recurrent  
245 apneas, or conversely, lead to ventilatory instability, promoting apnea occurrence. Mitochondrial ROS also  
246 activate the NLRP3 inflammasome in multiple pulmonary diseases, consistent with an inflammation model that  
247 includes our IL18-pathway and *HK1* results, ROS-related proinflammatory responses to lung capillary pressure,  
248 and evidence of alveolar epithelial injury/SDB interactions [14,82–87]. Our findings suggest value in investigating the  
249 mechanisms by which *ARMCX3* predisposes to SDB, and whether these associations are mediated by neuronal  
250 dysfunction and/or ROS and carotid body sensitization, and interact with the inflammasome.

251 Additional genes were significantly associated in population-specific analyses, including the

### Cade *et al.*: WGS analyses of sleep-disordered breathing

252 mitochondrial ribosomal gene *MRPS33*. Mitochondria are responsible for expression of the 13 essential  
253 components of the oxidative phosphorylation system, and a majority of the small subunit proteins have been  
254 implicated in disease [88]. The expression of several small and large subunit proteins are altered in a hypoxic  
255 environment [89]. *MRPS33* expression varies with oxygen treatment in COPD [90].

256

#### 257 Single-variant results

258 We identified four common frequency associated loci, including multiple-population associations with  
259 the *IL18RAP* region. The *IL18RAP* region has been associated with minimum SpO<sub>2</sub> [14], and here we further  
260 identify an association with average event desaturation, highlighting a role in an OSA-specific trait. Multiple  
261 variants in this region are also GTEx eQTL variants for both interleukin-18 receptor subunits *IL18RAP* and  
262 *IL18RI* (Supplementary Table 6) and experimental studies support a role for *IL18* signaling in mediating this  
263 association, possibly through effects of pulmonary inflammation on gas exchange (reviewed in [14]).

264 We identified three population-specific loci, including two novel associations in individuals of European  
265 ancestry (Figures 1 and 2). 65 variants in the *NRG1* region were associated with the AHI ( $p < 1.0 \times 10^{-8}$ ,  
266 Supplementary Table 6). This region was suggestively associated with sleep apnea in a Korean population [91],  
267 however the lead signals appear to be independent (rs10097555 Korean  $p = 2.6 \times 10^{-6}$ , EA  $p = 0.91$ ). *NRG1* is  
268 associated with lung development and acute lung injury, and mediates inflammasome-induced alveolar cell  
269 permeability [87,92–95]. *NRG1* promotes accumulation of HIF1A and has increased expression in vascular smooth  
270 muscle cells following exposure to intermittent hypoxia [96,97]. The lead *SLC45A2* region variant rs28777 (average  
271 SpO<sub>2</sub>  $p = 8.08 \times 10^{-10}$ ) has been associated with multiple traits and is in a splicing regulatory element with extreme  
272 population differentiation [98]. An association in the *ATP2B4* region with average SpO<sub>2</sub> in HAs [11] has been  
273 extended to a second hypoxemia trait at the same variant (Per90  $p = 3.31 \times 10^{-10}$ ). This gene is the main cellular  
274 membrane calcium pump in erythrocytes and also regulates vascular tone [99,100].

275

#### 276 Pathway analyses

277 Several gene pathways were identified in EA individuals using imputed gene expression in whole blood  
278 (Supplementary Table 9). KEGG\_RIG\_I\_LIKE\_RECEPTOR\_SIGNALING\_PATHWAY (retinoic acid-inducible  
279 gene I-like) was the most commonly observed, occurring in the top 10 results for 4 of the 5 phenotypes. This  
280 pathway initiates the immune response to RNA virus infection [101], consistent with a role for inflammation at the  
281 *NRG1* and *IL18RAP* loci. Steroid hormone biosynthesis (the most significantly associated pathway), PPAR  
282 signaling, and metabolism (via ‘starch and sucrose metabolism’) suggest the importance of biological pathways  
283 modulating energy homeostasis and balance and metabolic function [102]. In the gene-centric GIGSEA TFBS

### **Cade *et al.*: WGS analyses of sleep-disordered breathing**

284 analysis, V\$PEA3\_Q6 (*ETV4*) was the lead association for three phenotypes. *ETV4* influences branching in the  
285 developing lung and regulates hypoxia-inducible factor signaling [<sup>103,104</sup>], a major mechanism influencing  
286 ventilatory control.

287

#### 288 Transcription factor binding site enrichment

289 Several transcription factors were identified through interval enrichment of observed TFBS across the  
290 genome (Table 6). *FOXP2* was consistently the most enriched transcription factor and is known to regulate gene  
291 expression in epithelial lung tissue and response to lung injury through an inflammatory mechanism [<sup>105,106</sup>].  
292 *FOXP2* is also expressed in brainstem respiratory areas including the pre-Bötzinger complex (which is essential  
293 for respiratory rhythmogenesis) and impacts airway morphology [<sup>107,108</sup>]. Two lysine demethylases (*KDM4B* and  
294 *KDM6B*) were also identified. *KDM6B* (*JMJD3*) is required for a functional pre-Bötzinger complex [<sup>109,110</sup>] and  
295 reduced KDM6B protein expression was reported in hypoxic OSA patients [<sup>111</sup>]. *Kdm6b* also plays roles in  
296 immune function and lung development [<sup>112–114</sup>]. *Drosophila Kdm4b* knock-outs have increased sleep [<sup>115</sup>].  
297 *KDM4B* (*JMJD2B*) and *KDM6B* are both members of the JmjC protein domain family and are regulated by  
298 *HIF1A*, require oxygen as a cofactor and act as oxygen sensors for chromatin in hypoxia [<sup>116,117</sup>]. *EGRI* mediates  
299 hypoxia-induced pulmonary fibrosis [<sup>118</sup>]. *TP63* is associated with cleft palate in *Tp63* deficient mice, which is  
300 associated with an increased prevalence of OSA [<sup>119,120</sup>], suggesting that its relationship to OSA may be through  
301 pathways influencing craniofacial development. Among the leading 250-base pair sliding window results  
302 (Supplementary Table 13), 4:105708751-105709001 (Per90 HA  $p = 2.72 \times 10^{-9}$ ) is of note due to regional  
303 associations with lung function and expression in human lung [<sup>121</sup>].

304

#### 305 Strengths and weaknesses

306 This study is the first genome-wide analysis of objectively measured SDB traits using deep sequencing.  
307 Together with improved imputation quality, the TOPMed resource has enabled unprecedented genetic resolution.  
308 We examined clinically relevant phenotypes measured using rigorous methodology [<sup>5,7–10</sup>]. We analyzed data from  
309 10 studies of individuals from four population groups that used different ascertainment strategies, which may  
310 potentially improve the generalization of our results. While this analysis is among the largest performed for SDB  
311 traits to date, our moderate sample size has lower power to detect weaker associations, and data were not  
312 available to replicate these first rare variant associations. While there are multiple lines of evidence in the  
313 literature to support our findings, additional experimental followup analyses are required.

314

#### 315 Conclusion

**Cade *et al.*: WGS analyses of sleep-disordered breathing**

316 We have identified the first rare-variant and additional common-variant associations at genome-level  
317 significance with objectively measured SDB traits in humans. The results point to biologically relevant pathways  
318 for further study, including a novel X-linked association (*ARCMX3*), and a number of associations in genes that  
319 modulate lung development, inflammation, respiratory rhythmogenesis and *HIF1A*-mediated hypoxic-response  
320 pathways. These associations will motivate future sample collection and follow-up in cell-line and animal  
321 validation studies, with potential therapeutic benefit for sleep-disordered breathing and related comorbidities.



**Cade *et al.*: WGS analyses of sleep-disordered breathing**

322 **Supplementary Data**

323 Supplementary data include 5 figures and 13 tables.

324

325 **Acknowledgements**

326 The authors wish to thank the participants and study staff of all of our cohorts for their important  
327 contributions.

328 Whole genome sequencing (WGS) for the Trans-Omics in Precision Medicine (TOPMed) program was  
329 supported by the National Heart, Lung and Blood Institute (NHLBI). WGS for "NHLBI TOPMed: Trans-Omics  
330 for Precision Medicine Whole Genome Sequencing Project: ARIC (phs001211.v1.p1) was performed at Baylor  
331 College of Medicine Human Genome Sequencing Center (HHSN268201500015C and 3U54HG003273-12S2)  
332 and the Broad Institute of MIT and Harvard (3R01HL092577-06S1). WGS for "NHLBI TOPMed: The Cleveland  
333 Family Study (WGS) (phs000954.v2.p1) was performed at University of Washington Northwest Genomics  
334 Center (3R01HL098433-05S1). WGS for "NHLBI TOPMed: Cardiovascular Health Study (phs001368.v1.p1)  
335 was performed at Baylor College of Medicine Human Genome Sequencing Center (HHSN268201500015C).  
336 WGS for "NHLBI TOPMed: Whole Genome Sequencing and Related Phenotypes in the Framingham Heart  
337 Study (phs000974.v3.p2) was performed at the Broad Institute of MIT and Harvard (3R01HL092577-06S1).  
338 WGS for "NHLBI TOPMed: Hispanic Community Health Study/Study of Latinos (HCHS/SOL) (phs001395) was  
339 performed at the Baylor College of Medicine Human Genome Sequencing Center (HHSN268201500015C and  
340 3U54HG003273-12S2). WGS for "NHLBI TOPMed: The Jackson Heart Study (phs000964.v3.p1) was performed  
341 at University of Washington Northwest Genomics Center (HHSN268201100037C). WGS for "NHLBI TOPMed:  
342 NHLBI TOPMed: MESA (phs001416.v1.p1) was performed at the Broad Institute of MIT and Harvard  
343 (3U54HG003067-13S1). Centralized read mapping and genotype calling, along with variant quality metrics and  
344 filtering were provided by the TOPMed Informatics Research Center (3R01HL-117626-02S1). Phenotype  
345 harmonization, data management, sample-identity QC, and general study coordination, were provided by the  
346 TOPMed Data Coordinating Center (3R01HL-120393-02S1). We gratefully acknowledge the studies and  
347 participants who provided biological samples and data for TOPMed.

348 The Genome Sequencing Program (GSP) was funded by the National Human Genome Research Institute  
349 (NHGRI), the National Heart, Lung, and Blood Institute (NHLBI), and the National Eye Institute (NEI). The GSP  
350 Coordinating Center (U24 HG008956) contributed to cross-program scientific initiatives and provided logistical  
351 and general study coordination. The Centers for Common Disease Genomics (CCDG) program was supported by  
352 NHGRI and NHLBI, and CCDG-funded whole genome sequencing of the ARIC and HCHS/SOL studies was  
353 performed at the Baylor College of Medicine Human Genome Sequencing Center (UM1 HG008898 and  
354 R01HL059367).

**Cade *et al.*: WGS analyses of sleep-disordered breathing**

355 Brian Cade is supported by grants from the National Institutes of Health [K01-HL135405-01, R01-  
356 HL113338-04, R35-HL135818-01] and the American Thoracic Society Foundation  
357 (<http://foundation.thoracic.org>). Susan Redline is partially supported by grants from the National Institutes of  
358 Health [R35-HL135818-01, R01-HL113338-04]. Sanjay Patel has had grant support through his institution from  
359 the ResMed Foundation, the American Sleep Medicine Foundation, Bayer Pharmaceuticals, and Philips  
360 Respironics. James Wilson is supported by U54GM115428 from the National Institute of General Medical  
361 Sciences.

362 The Atherosclerosis Risk in Communities (ARIC) study has been funded in whole or in part with Federal  
363 funds from the National Heart, Lung, and Blood Institute, National Institutes of Health, Department of Health and  
364 Human Services (contract numbers HHSN268201700001I, HHSN268201700002I, HHSN268201700003I,  
365 HHSN268201700004I and HHSN268201700005I), R01HL087641, R01HL059367 and R01HL086694; National  
366 Human Genome Research Institute contract U01HG004402; and National Institutes of Health contract  
367 HHSN268200625226C. The authors thank the staff and participants of the ARIC study for their important  
368 contributions. Infrastructure was partly supported by Grant Number UL1RR025005, a component of the National  
369 Institutes of Health and NIH Roadmap for Medical Research.

370 This Cardiovascular Health Study (CHS) research was supported by NHLBI contracts  
371 HHSN268201200036C, HHSN268200800007C, HHSN268200960009C, HHSN268201800001C N01HC55222,  
372 N01HC85079, N01HC85080, N01HC85081, N01HC85082, N01HC85083, N01HC85086; and NHLBI grants  
373 U01HL080295, U01HL130114, R01HL087652, R01HL105756, R01HL103612, R01HL085251, and  
374 R01HL120393 with additional contribution from the National Institute of Neurological Disorders and Stroke  
375 (NINDS). Additional support was provided through R01AG023629 from the National Institute on Aging (NIA).  
376 A full list of principal CHS investigators and institutions can be found at [CHS-NHLBI.org](http://CHS-NHLBI.org).

377 The Cleveland Family Study has been supported by National Institutes of Health grants [R01-HL046380,  
378 KL2-RR024990, R35-HL135818, and R01-HL113338].

379 The Framingham Heart Study (FHS) has been supported by contracts N01-HC-25195 and  
380 HHSN268201500001I and grant R01 HL092577. The Framingham Heart Study thanks the study participants and  
381 the multitude of investigators who over its 70 year history continue to contribute so much to further our  
382 knowledge of heart, lung, blood and sleep disorders and associated traits.

383 The Hispanic Community Health Study/Study of Latinos was carried out as a collaborative study  
384 supported by contracts from the NHLBI to the University of North Carolina (HHSN268201300001I / N01-  
385 HC65233), University of Miami (HHSN268201300004I / N01-HC65234), Albert Einstein College of Medicine  
386 (HHSN268201300002I / N01-HC65235), University of Illinois at Chicago (HHSN268201300003I), Northwestern  
387 University (N01-HC65236), and San Diego State University (HHSN268201300005I / N01-HC65237). The

**Cade *et al.*: WGS analyses of sleep-disordered breathing**

388 following Institutes/Centers/Offices contribute to the HCHS/SOL through a transfer of funds to the NHLBI:  
389 National Institute on Minority Health and Health Disparities, National Institute on Deafness and Other  
390 Communication Disorders, National Institute of Dental and Craniofacial Research, National Institute of Diabetes  
391 and Digestive and Kidney Diseases, National Institute of Neurological Disorders and Stroke, NIH Institution-  
392 Office of Dietary Supplements. The Genetic Analysis Center at Washington University was supported by NHLBI  
393 and NIDCR contracts (HHSN268201300005C AM03 and MOD03). The views expressed in this manuscript are  
394 those of the authors and do not necessarily represent the views of the National Heart, Lung, and Blood Institute;  
395 the National Institutes of Health; or the U.S. Department of Health and Human Services. This manuscript was not  
396 approved by the HCHS/SOL publications committee. The authors thank the staff and participants of HCHS/SOL  
397 for their important contributions. Investigator's website - <http://www.csec.unc.edu/hchs/>

398 The Jackson Heart Study (JHS) is supported and conducted in collaboration with Jackson State University  
399 (HHSN268201800013I), Tougaloo College (HHSN268201800014I), the Mississippi State Department of Health  
400 (HHSN268201800015I/HHSN26800001) and the University of Mississippi Medical Center  
401 (HHSN268201800010I, HHSN268201800011I and HHSN268201800012I) contracts from the National Heart,  
402 Lung, and Blood Institute (NHLBI) and the National Institute for Minority Health and Health Disparities  
403 (NIMHD). The authors also wish to thank the staff and participants of the JHS.

404 MESA and the MESA SHARe project are conducted and supported by the National Heart, Lung, and  
405 Blood Institute (NHLBI) in collaboration with MESA investigators. Support for MESA is provided by contracts  
406 HHSN268201500003I, N01-HC-95159, N01-HC-95160, N01-HC-95161, N01-HC-95162, N01-HC-95163, N01-  
407 HC-95164, N01-HC-95165, N01-HC-95166, N01-HC-95167, N01-HC-95168, N01-HC-95169, UL1-TR-000040,  
408 UL1-TR-001079, UL1-TR-001420. MESA Family is conducted and supported by the National Heart, Lung, and  
409 Blood Institute (NHLBI) in collaboration with MESA investigators. Support is provided by grants and contracts  
410 R01HL071051, R01HL071205, R01HL071250, R01HL071251, R01HL071258, R01HL071259, and by the  
411 National Center for Research Resources, Grant UL1RR033176. The provision of genotyping data was supported  
412 in part by the National Center for Advancing Translational Sciences, CTSI grant UL1TR001881, and the National  
413 Institute of Diabetes and Digestive and Kidney Disease Diabetes Research Center (DRC) grant DK063491 to the  
414 Southern California Diabetes Endocrinology Research Center.

415 The Osteoporotic Fractures in Men (MrOS) Study is supported by NIH funding. The following institutes  
416 provide support: the National Institute on Aging (NIA), the National Institute of Arthritis and Musculoskeletal  
417 and Skin Diseases (NIAMS), NCATS, and NIH Roadmap for Medical Research under the following grant  
418 numbers: U01 AG027810, U01 AG042124, U01 AG042139, U01 AG042140, U01 AG042143, U01 AG042145,  
419 U01 AG042168, U01 AR066160, and UL1 TR000128. The NHLBI provides funding for the MrOS Sleep  
420 ancillary study "Outcomes of Sleep Disorders in Older Men" under the following grant numbers: R01 HL071194,  
421 R01 HL070848, R01 HL070847, R01 HL070842, R01 HL070841, R01 HL070837, R01 HL070838, and R01

**Cade *et al.*: WGS analyses of sleep-disordered breathing**

422 HL070839. The NIAMS provides funding for the MrOS ancillary study ‘Replication of candidate gene  
423 associations and bone strength phenotype in MrOS’ under the grant number R01 AR051124. The NIAMS  
424 provides funding for the MrOS ancillary study ‘GWAS in MrOS and SOF’ under the grant number RC2  
425 AR058973.

426 The Starr County Health Studies is supported in part by grants R01 DK073541, U01 DK085501, R01  
427 AI085014, and R01 HL102830 from the National Institutes of Health, and funds from the University of Texas  
428 Health Science Center at Houston. We thank the field staff in Starr County for their careful collection of these  
429 data and are especially grateful to the participants who so graciously cooperated and gave of their time.

430 Funding for the Western Australian Sleep Health Study was obtained from the Sir Charles Gairdner and  
431 Hollywood Private Hospital Research Foundations, the Western Australian Sleep Disorders Research Institute,  
432 and the Centre for Genetic Epidemiology and Biostatistics at the University of Western Australia. Funding for the  
433 GWAS genotyping obtained from the Ontario Institute for Cancer Research and a McLaughlin Centre Accelerator  
434 Grant from the University of Toronto.

435

436 **Author Contributions**

437 Conception and design: B.E.C., G.R.A., E.A.B., A.C., L.A.C., R.C.K., D.A.N., K.E.N., B.M.P., J.I.R., S.S.R.,  
438 R.P.T., R.S.V., J.G.W., S.R.

439 Data acquisition: B.E.C., J.L., T.S., M.Z., H.C., S.A.G., D.J.G., J.M.L., J.L., X.L., H.M., S.R.P., S.M.P., R.S.,  
440 N.A.S., H.W., X.Z., D.S.E., C.L.H., D.R.H., S.M., L.J.P., K.L.S., G.J.T., G.R.A., D.A.N., S.R.

441 Analysis: B.E.C., J.L.

442 Interpretation, draft and review, and final approval: all authors.

443 B.E.C. and S.R. had full access to the study data and take responsibility for the integrity of the data and accuracy  
444 of analyses.

445

446 **Competing Interests**

447 The authors disclose the following industry funding, which they believe is unrelated to this study. SRP  
448 has had grant support through his institution from the ResMed Foundation, Bayer Pharmaceuticals, and Philips  
449 Respironics. BMP serves on the Steering Committee of the Yale Open Data Access Project, funded by Johnson &  
450 Johnson. KLS has grant funding from Merck.

**Cade *et al.*: WGS analyses of sleep-disordered breathing**

**References**

1. Marin, J. M., Carrizo, S. J., Vicente, E. & Agusti, A. G. N. Long-term cardiovascular outcomes in men with obstructive sleep apnoea-hypopnoea with or without treatment with continuous positive airway pressure: an observational study. *Lancet* **365**, 1046–53 (2005).
2. Strausz, S. *et al.* Obstructive sleep apnoea and the risk for coronary heart disease and type 2 diabetes: a longitudinal population-based study in Finland. *BMJ Open* **8**, e022752 (2018).
3. Yaffe, K. *et al.* Sleep-disordered breathing, hypoxia, and risk of mild cognitive impairment and dementia in older women. *JAMA* **306**, 613–9 (2011).
4. Nieto, F. J. *et al.* Sleep-disordered breathing and cancer mortality: results from the Wisconsin Sleep Cohort Study. *Am J Respir Crit Care Med* **186**, 190–4 (2012).
5. Peppard, P. E. & Hagen, E. W. The Last 25 Years of Obstructive Sleep Apnea Epidemiology-and the Next 25? *Am. J. Respir. Crit. Care Med.* **197**, 310–312 (2018).
6. Redline, S. Genetics of Obstructive Sleep Apnea. in *Principles and Practice of Sleep Medicine* (ed. Kryger, W. C., Meir H;Roth, Thomas;Dement) 1183–1193 (Saunders, 2011).
7. Kendzerska, T., Gershon, A. S., Hawker, G., Leung, R. S. & Tomlinson, G. Obstructive sleep apnea and risk of cardiovascular events and all-cause mortality: a decade-long historical cohort study. *PLoS Med* **11**, e1001599 (2014).
8. Oldenburg, O. *et al.* Nocturnal hypoxaemia is associated with increased mortality in stable heart failure patients. *Eur Heart J* **37**, 1695–703 (2016).
9. Gellen, B. *et al.* Apnea-hypopnea and desaturations in heart failure with reduced ejection fraction: Are we aiming at the right target? *Int J Cardiol* **203**, 1022–8 (2016).
10. Pham, L. V. & Polotsky, V. Y. Genome-Wide Association Studies in Obstructive Sleep Apnea. Will We Catch a Black Cat in a Dark Room? *Am J Respir Crit Care Med* **194**, 789–791 (2016).
11. Cade, B. E. *et al.* Genetic Associations with Obstructive Sleep Apnea Traits in Hispanic/Latino Americans. *Am J Respir Crit Care Med* **194**, 886–897 (2016).
12. Chen, H. *et al.* Multiethnic Meta-Analysis Identifies RAI1 as a Possible Obstructive Sleep Apnea-related Quantitative Trait Locus in Men. *Am. J. Respir. Cell Mol. Biol.* **58**, 391–401 (2018).

**Cade *et al.*: WGS analyses of sleep-disordered breathing**

13. Wang, H. *et al.* Variants in angiotensin-converting enzyme 2 (ACE2) contribute to variation in nocturnal oxyhaemoglobin saturation level. *Hum Mol Genet* **25**, 5244–5253 (2016).
14. Cade, B. E. *et al.* Associations of Variants In the Hexokinase 1 and Interleukin 18 Receptor Regions with Oxyhemoglobin Saturation During Sleep. *PLoS Genet.* **15**, e1007739 (2019).
15. Wang, H. *et al.* Admixture mapping identifies novel loci for obstructive sleep apnea in Hispanic/Latino Americans. *Hum. Mol. Genet.* **28**, 675–687 (2019).
16. Gazal, S. *et al.* Linkage disequilibrium-dependent architecture of human complex traits shows action of negative selection. *Nat. Genet.* **49**, 1421–1427 (2017).
17. Taliun, D. *et al.* Sequencing of 53,831 diverse genomes from the NHLBI TOPMed Program. Preprint at <https://www.biorxiv.org/content/10.1101/563866v1> (2019).
18. Das, S. *et al.* Next-generation genotype imputation service and methods. *Nat. Genet.* **48**, 1284–1287 (2016).
19. The ARIC Investigators. The Atherosclerosis Risk in Communities (ARIC) Study: design and objectives. The ARIC investigators. *Am. J. Epidemiol.* **129**, 687–702 (1989).
20. Fried, L. P. *et al.* The Cardiovascular Health Study: design and rationale. *Ann Epidemiol* **1**, 263–76 (1991).
21. Feinleib, M. The Framingham Study: sample selection, follow-up, and methods of analyses. *Natl Cancer Inst Monogr* **67**, 59–64 (1985).
22. Quan, S. F. *et al.* The Sleep Heart Health Study: design, rationale, and methods. *Sleep* **20**, 1077–85 (1997).
23. Bild, D. E. *et al.* Multi-Ethnic Study of Atherosclerosis: objectives and design. *Am J Epidemiol* **156**, 871–81 (2002).
24. Chen, X. *et al.* Racial/Ethnic Differences in Sleep Disturbances: The Multi-Ethnic Study of Atherosclerosis (MESA). *Sleep* **38**, 877–88 (2015).
25. Redline, S. *et al.* The familial aggregation of obstructive sleep apnea. *Am J Respir Crit Care Med* **151**, 682–7 (1995).
26. Sorlie, P. D. *et al.* Design and implementation of the Hispanic Community Health Study/Study of Latinos. *Ann Epidemiol* **20**, 629–41 (2010).
27. Redline, S. *et al.* Sleep-disordered breathing in Hispanic/Latino individuals of diverse backgrounds. The Hispanic Community Health Study/Study of Latinos. *Am J Respir Crit Care Med* **189**, 335–44 (2014).



**Cade et al.: WGS analyses of sleep-disordered breathing**

28. Westbrook, P. R. *et al.* Description and validation of the apnea risk evaluation system: a novel method to diagnose sleep apnea-hypopnea in the home. *Chest* **128**, 2166–75 (2005).
29. Taylor, H. A. J. *et al.* Toward resolution of cardiovascular health disparities in African Americans: design and methods of the Jackson Heart Study. *Ethn Dis* **15**, S6-4–17 (2005).
30. Johnson, D. A. *et al.* Prevalence and correlates of obstructive sleep apnea among African Americans: the Jackson Heart Sleep Study. *Sleep* **41**, (2018).
31. Ng, S. S. S. *et al.* Validation of Embletta portable diagnostic system for identifying patients with suspected obstructive sleep apnoea syndrome (OSAS). *Respirol. Carlton Vic* **15**, 336–342 (2010).
32. Orwoll, E. *et al.* Design and baseline characteristics of the osteoporotic fractures in men (MrOS) study—a large observational study of the determinants of fracture in older men. *Contemp Clin Trials* **26**, 569–85 (2005).
33. Blank, J. B. *et al.* Overview of recruitment for the osteoporotic fractures in men study (MrOS). *Contemp Clin Trials* **26**, 557–68 (2005).
34. Mehra, R. *et al.* Prevalence and correlates of sleep-disordered breathing in older men: osteoporotic fractures in men sleep study. *J Am Geriatr Soc* **55**, 1356–64 (2007).
35. Hanis, C. L. *et al.* Diabetes among Mexican Americans in Starr County, Texas. *Am J Epidemiol* **118**, 659–72 (1983).
36. Hanis, C. L. *et al.* Beyond type 2 diabetes, obesity and hypertension: an axis including sleep apnea, left ventricular hypertrophy, endothelial dysfunction, and aortic stiffness among Mexican Americans in Starr County, Texas. *Cardiovasc Diabetol* **15**, 86 (2016).
37. Choi, J. H. *et al.* Validation study of portable device for the diagnosis of obstructive sleep apnea according to the new AASM scoring criteria: Watch-PAT 100. *Acta Otolaryngol. (Stockh.)* **130**, 838–843 (2010).
38. Mukherjee, S. *et al.* Cohort profile: the Western Australian Sleep Health Study. *Sleep Breath* **16**, 205–15 (2012).
39. Redline, S. *et al.* Methods for obtaining and analyzing unattended polysomnography data for a multicenter study. Sleep Heart Health Research Group. *Sleep* **21**, 759–67 (1998).
40. Whitney, C. W. *et al.* Reliability of scoring respiratory disturbance indices and sleep staging. *Sleep* **21**, 749–

**Cade *et al.*: WGS analyses of sleep-disordered breathing**

57 (1998).

41. Regier, A. A. *et al.* Functional equivalence of genome sequencing analysis pipelines enables harmonized variant calling across human genetics projects. *Nat. Commun.* **9**, 4038 (2018).
42. Cingolani, P. *et al.* A program for annotating and predicting the effects of single nucleotide polymorphisms, SnpEff: SNPs in the genome of *Drosophila melanogaster* strain w1118; iso-2; iso-3. *Fly (Austin)* **6**, 80–92 (2012).
43. Kang, H. M. *et al.* Variance component model to account for sample structure in genome-wide association studies. *Nat. Genet.* **42**, 348–354 (2010).
44. Hunt, S. E. *et al.* Ensembl variation resources. *Database J. Biol. Databases Curation* **2018**, (2018).
45. Dreos, R., Ambrosini, G., Groux, R., Cavin Périer, R. & Bucher, P. The eukaryotic promoter database in its 30th year: focus on non-vertebrate organisms. *Nucleic Acids Res.* **45**, D51–D55 (2017).
46. Yevshin, I., Sharipov, R., Kolmykov, S., Kondrakhin, Y. & Kolpakov, F. GTRD: a database on gene transcription regulation-2019 update. *Nucleic Acids Res.* (2018). doi:10.1093/nar/gky1128
47. Rogers, M. F. *et al.* FATHMM-XF: accurate prediction of pathogenic point mutations via extended features. *Bioinforma. Oxf. Engl.* **34**, 511–513 (2018).
48. di Iulio, J. *et al.* The human noncoding genome defined by genetic diversity. *Nat. Genet.* **50**, 333–337 (2018).
49. Sundaram, L. *et al.* Predicting the clinical impact of human mutation with deep neural networks. *Nat. Genet.* **50**, 1161–1170 (2018).
50. Havrilla, J. M., Pedersen, B. S., Layer, R. M. & Quinlan, A. R. A map of constrained coding regions in the human genome. *Nat. Genet.* **51**, 88–95 (2019).
51. Dozmorov, M. G. Epigenomic annotation-based interpretation of genomic data: from enrichment analysis to machine learning. *Bioinforma. Oxf. Engl.* **33**, 3323–3330 (2017).
52. Chèneby, J., Gheorghe, M., Artufel, M., Mathelier, A. & Ballester, B. ReMap 2018: an updated atlas of regulatory regions from an integrative analysis of DNA-binding ChIP-seq experiments. *Nucleic Acids Res.* **46**, D267–D275 (2018).
53. Willer, C. J., Li, Y. & Abecasis, G. R. METAL: fast and efficient meta-analysis of genomewide association

**Cade et al.: WGS analyses of sleep-disordered breathing**

- scans. *Bioinformatics* **26**, 2190–1 (2010).
54. Barbeira, A. *et al.* Integrating tissue specific mechanisms into GWAS summary results. (2017).  
doi:10.1101/045260
55. Zhu, S. *et al.* GIGSEA: Genotype Imputed Gene Set Enrichment Analysis using GWAS Summary Level Data. *Bioinforma. Oxf. Engl.* (2018). doi:10.1093/bioinformatics/bty529
56. Cotto, K. C. *et al.* DGIdb 3.0: a redesign and expansion of the drug-gene interaction database. *Nucleic Acids Res.* **46**, D1068–D1073 (2018).
57. Stelzer, G. *et al.* The GeneCards Suite: From Gene Data Mining to Disease Genome Sequence Analyses. *Curr. Protoc. Bioinforma.* **54**, 1.30.1-1.30.33 (2016).
58. GTEx Consortium *et al.* Genetic effects on gene expression across human tissues. *Nature* **550**, 204–213 (2017).
59. Roadmap Epigenomics Consortium *et al.* Integrative analysis of 111 reference human epigenomes. *Nature* **518**, 317–30 (2015).
60. Martens, J. H. A. & Stunnenberg, H. G. BLUEPRINT: mapping human blood cell epigenomes. *Haematologica* **98**, 1487–9 (2013).
61. Vermunt, M. W. *et al.* Large-scale identification of coregulated enhancer networks in the adult human brain. *Cell Rep* **9**, 767–79 (2014).
62. Gami, A. S. *et al.* Obstructive sleep apnea, obesity, and the risk of incident atrial fibrillation. *J Am Coll Cardiol* **49**, 565–71 (2007).
63. Campos-Rodriguez, F. *et al.* Association between obstructive sleep apnea and cancer incidence in a large multicenter Spanish cohort. *Am J Respir Crit Care Med* **187**, 99–105 (2013).
64. Gozal, D., Ham, S. A. & Mokhlesi, B. Sleep Apnea and Cancer: Analysis of a Nationwide Population Sample. *Sleep* **39**, 1493–500 (2016).
65. Reutrakul, S. & Mokhlesi, B. Obstructive Sleep Apnea and Diabetes: A State of the Art Review. *Chest* **152**, 1070–1086 (2017).
66. Minville, C. *et al.* Nonalcoholic fatty liver disease, nocturnal hypoxia, and endothelial function in patients with sleep apnea. *Chest* **145**, 525–533 (2014).

**Cade et al.: WGS analyses of sleep-disordered breathing**

67. Corte, T. J. *et al.* Elevated nocturnal desaturation index predicts mortality in interstitial lung disease. *Sarcoidosis Vasc Diffuse Lung Dis* **29**, 41–50 (2012).
68. Young, T. *et al.* The occurrence of sleep-disordered breathing among middle-aged adults. *N. Engl. J. Med.* **328**, 1230–1235 (1993).
69. Mohsenin, V. Effects of gender on upper airway collapsibility and severity of obstructive sleep apnea. *Sleep Med.* **4**, 523–529 (2003).
70. Wimms, A., Woehrle, H., Ketheeswaran, S., Ramanan, D. & Armitstead, J. Obstructive Sleep Apnea in Women: Specific Issues and Interventions. *BioMed Res. Int.* **2016**, 1764837 (2016).
71. López-Doménech, G. *et al.* The Eutherian *Armcx* genes regulate mitochondrial trafficking in neurons and interact with Miro and Trak2. *Nat. Commun.* **3**, 814 (2012).
72. Serrat, R. *et al.* The non-canonical Wnt/PKC pathway regulates mitochondrial dynamics through degradation of the arm-like domain-containing protein Alex3. *PLoS One* **8**, e67773 (2013).
73. Cartoni, R. *et al.* The Mammalian-Specific Protein *Armcx1* Regulates Mitochondrial Transport during Axon Regeneration. *Neuron* **92**, 1294–1307 (2016).
74. Yoon, J. C. *et al.* Wnt signaling regulates mitochondrial physiology and insulin sensitivity. *Genes Dev.* **24**, 1507–1518 (2010).
75. Ramezani, R. J. & Stacpoole, P. W. Sleep disorders associated with primary mitochondrial diseases. *J. Clin. Sleep Med. JCSM Off. Publ. Am. Acad. Sleep Med.* **10**, 1233–1239 (2014).
76. Waypa, G. B., Smith, K. A. & Schumacker, P. T. O<sub>2</sub> sensing, mitochondria and ROS signaling: The fog is lifting. *Mol. Aspects Med.* **47–48**, 76–89 (2016).
77. Murphy, M. P. How mitochondria produce reactive oxygen species. *Biochem. J.* **417**, 1–13 (2009).
78. Pialoux, V. *et al.* Effects of exposure to intermittent hypoxia on oxidative stress and acute hypoxic ventilatory response in humans. *Am. J. Respir. Crit. Care Med.* **180**, 1002–1009 (2009).
79. Morgan, B. J., Bates, M. L., Rio, R. D., Wang, Z. & Dopp, J. M. Oxidative stress augments chemoreflex sensitivity in rats exposed to chronic intermittent hypoxia. *Respir. Physiol. Neurobiol.* **234**, 47–59 (2016).
80. MacFarlane, P. M. & Mitchell, G. S. Respiratory long-term facilitation following intermittent hypoxia requires reactive oxygen species formation. *Neuroscience* **152**, 189–197 (2008).

**Cade *et al.*: WGS analyses of sleep-disordered breathing**

81. Peng, Y.-J., Overholt, J. L., Kline, D., Kumar, G. K. & Prabhakar, N. R. Induction of sensory long-term facilitation in the carotid body by intermittent hypoxia: implications for recurrent apneas. *Proc. Natl. Acad. Sci. U. S. A.* **100**, 10073–10078 (2003).
82. Dan Dunn, J., Alvarez, L. A., Zhang, X. & Soldati, T. Reactive oxygen species and mitochondria: A nexus of cellular homeostasis. *Redox Biol.* **6**, 472–485 (2015).
83. Kim, S. R. *et al.* NLRP3 inflammasome activation by mitochondrial ROS in bronchial epithelial cells is required for allergic inflammation. *Cell Death Dis.* **5**, e1498 (2014).
84. Kim, S., Lee, Y., Kim, H. & Kim, S. Activation of NLRP3 inflammasome is regulated by mitochondrial ROS via PI3K-HIF-VEGF pathway in acute lung injury. *Eur. Respir. J.* **46**, PA3026 (2015).
85. Moon, J.-S. *et al.* mTORC1-Induced HK1-Dependent Glycolysis Regulates NLRP3 Inflammasome Activation. *Cell Rep* **12**, 102–15 (2015).
86. Ichimura, H., Parthasarathi, K., Quadri, S., Issekutz, A. C. & Bhattacharya, J. Mechano-oxidative coupling by mitochondria induces proinflammatory responses in lung venular capillaries. *J. Clin. Invest.* **111**, 691–699 (2003).
87. Kim, J. S. *et al.* Obstructive Sleep Apnea and Subclinical Interstitial Lung Disease in the Multi-Ethnic Study of Atherosclerosis (MESA). *Ann. Am. Thorac. Soc.* **14**, 1786–1795 (2017).
88. Gopisetty, G. & Thangarajan, R. Mammalian mitochondrial ribosomal small subunit (MRPS) genes: A putative role in human disease. *Gene* **589**, 27–35 (2016).
89. Bousquet, P. A. *et al.* Hypoxia Strongly Affects Mitochondrial Ribosomal Proteins and Translocases, as Shown by Quantitative Proteomics of HeLa Cells. *Int. J. Proteomics* **2015**, 678527 (2015).
90. Seo, M. *et al.* Genomics and response to long-term oxygen therapy in chronic obstructive pulmonary disease. *J. Mol. Med. Berl. Ger.* **96**, 1375–1385 (2018).
91. Baik, I., Seo, H. S., Yoon, D., Kim, S. H. & Shin, C. Associations of Sleep Apnea, NRG1 Polymorphisms, Alcohol Consumption, and Cerebral White Matter Hyperintensities: Analysis with Genome-Wide Association Data. *Sleep* **38**, 1137–43 (2015).
92. Finigan, J. H. *et al.* Bronchoalveolar lavage neuregulin-1 is elevated in acute lung injury and correlates with inflammation. *Eur. Respir. J.* **41**, 396–401 (2013).

**Cade et al.: WGS analyses of sleep-disordered breathing**

93. Liu, J., Nethery, D. & Kern, J. A. Neuregulin-1 induces branching morphogenesis in the developing lung through a P13K signal pathway. *Exp. Lung Res.* **30**, 465–478 (2004).
94. Venugopal, R. et al. Inflammasome Inhibition Suppresses Alveolar Cell Permeability Through Retention of Neuregulin-1 (NRG-1). *Cell. Physiol. Biochem. Int. J. Exp. Cell. Physiol. Biochem. Pharmacol.* **36**, 2012–2024 (2015).
95. Lederer, D. J., Jelic, S., Basner, R. C., Ishizaka, A. & Bhattacharya, J. Circulating KL-6, a biomarker of lung injury, in obstructive sleep apnoea. *Eur Respir J* **33**, 793–6 (2009).
96. Paatero, I. et al. Interaction with ErbB4 promotes hypoxia-inducible factor-1 $\alpha$  signaling. *J. Biol. Chem.* **287**, 9659–9671 (2012).
97. Kyotani, Y. et al. Intermittent hypoxia induces the proliferation of rat vascular smooth muscle cell with the increases in epidermal growth factor family and erbB2 receptor. *Exp. Cell Res.* **319**, 3042–3050 (2013).
98. Gamazon, E. R., Konkashbaev, A., Derks, E. M., Cox, N. J. & Lee, Y. Evidence of selection on splicing-associated loci in human populations and relevance to disease loci mapping. *Sci. Rep.* **7**, 5980 (2017).
99. Stauffer, T. P., Guerini, D. & Carafoli, E. Tissue distribution of the four gene products of the plasma membrane Ca<sup>2+</sup> pump. A study using specific antibodies. *J Biol Chem* **270**, 12184–90 (1995).
100. Schuh, K. et al. Regulation of vascular tone in animals overexpressing the sarcolemmal calcium pump. *J Biol Chem* **278**, 41246–52 (2003).
101. Kell, A. M. & Gale, M. RIG-I in RNA virus recognition. *Virology* **479–480**, 110–121 (2015).
102. Gharib, S. A., Hayes, A. L., Rosen, M. J. & Patel, S. R. A pathway-based analysis on the effects of obstructive sleep apnea in modulating visceral fat transcriptome. *Sleep* **36**, 23–30 (2013).
103. Herriges, J. C. et al. FGF-Regulated ETV Transcription Factors Control FGF-SHH Feedback Loop in Lung Branching. *Dev. Cell* **35**, 322–332 (2015).
104. Wollenick, K. et al. Synthetic transactivation screening reveals ETV4 as broad coactivator of hypoxia-inducible factor signaling. *Nucleic Acids Res.* **40**, 1928–1943 (2012).
105. Shu, W., Yang, H., Zhang, L., Lu, M. M. & Morrisey, E. E. Characterization of a new subfamily of winged-helix/forkhead (Fox) genes that are expressed in the lung and act as transcriptional repressors. *J. Biol. Chem.* **276**, 27488–27497 (2001).



**Cade et al.: WGS analyses of sleep-disordered breathing**

106. Chokas, A. L. *et al.* Foxp1/2/4-NuRD interactions regulate gene expression and epithelial injury response in the lung via regulation of interleukin-6. *J. Biol. Chem.* **285**, 13304–13313 (2010).
107. Xu, S. *et al.* Foxp2 regulates anatomical features that may be relevant for vocal behaviors and bipedal locomotion. *Proc. Natl. Acad. Sci. U. S. A.* **115**, 8799–8804 (2018).
108. Stanić, D., Dhingra, R. R. & Dutschmann, M. Expression of the transcription factor FOXP2 in brainstem respiratory circuits of adult rat is restricted to upper-airway pre-motor areas. *Respir. Physiol. Neurobiol.* **250**, 14–18 (2018).
109. Burgold, T. *et al.* The H3K27 demethylase JMJD3 is required for maintenance of the embryonic respiratory neuronal network, neonatal breathing, and survival. *Cell Rep.* **2**, 1244–1258 (2012).
110. Smith, J. C., Ellenberger, H. H., Ballanyi, K., Richter, D. W. & Feldman, J. L. Pre-Bötzinger complex: a brainstem region that may generate respiratory rhythm in mammals. *Science* **254**, 726–729 (1991).
111. Chen, Y. *et al.* Global Histone H3K23/H3K36 Hypoacetylation and HDAC1 Up-regulation Are Associated with Disease Severity and Adverse Consequences in Obstructive Sleep Apnea Patients. *Am J Respir Crit Care Med* **197**, A6411 (2018).
112. Satoh, T. *et al.* The Jmjd3-Irf4 axis regulates M2 macrophage polarization and host responses against helminth infection. *Nat. Immunol.* **11**, 936–944 (2010).
113. De Santa, F. *et al.* The histone H3 lysine-27 demethylase Jmjd3 links inflammation to inhibition of polycomb-mediated gene silencing. *Cell* **130**, 1083–1094 (2007).
114. Li, Q. *et al.* Stage-dependent and locus-specific role of histone demethylase Jumonji D3 (JMJD3) in the embryonic stages of lung development. *PLoS Genet.* **10**, e1004524 (2014).
115. Shalaby, N. A. *et al.* JmjC domain proteins modulate circadian behaviors and sleep in *Drosophila*. *Sci. Rep.* **8**, 815 (2018).
116. Shmakova, A., Batie, M., Druker, J. & Rocha, S. Chromatin and oxygen sensing in the context of JmjC histone demethylases. *Biochem. J.* **462**, 385–395 (2014).
117. Hancock, R. L., Masson, N., Dunne, K., Flashman, E. & Kawamura, A. The Activity of JmjC Histone Lysine Demethylase KDM4A is Highly Sensitive to Oxygen Concentrations. *ACS Chem. Biol.* **12**, 1011–1019 (2017).

**Cade *et al.*: WGS analyses of sleep-disordered breathing**

118. Yan, S. F. *et al.* Tissue factor transcription driven by Egr-1 is a critical mechanism of murine pulmonary fibrin deposition in hypoxia. *Proc. Natl. Acad. Sci. U. S. A.* **95**, 8298–8303 (1998).
119. Thomason, H. A., Dixon, M. J. & Dixon, J. Facial clefting in Tp63 deficient mice results from altered Bmp4, Fgf8 and Shh signaling. *Dev. Biol.* **321**, 273–282 (2008).
120. Robison, J. G. & Otteson, T. D. Increased prevalence of obstructive sleep apnea in patients with cleft palate. *Arch. Otolaryngol. Head Neck Surg.* **137**, 269–274 (2011).
121. Obeidat, M. *et al.* GSTCD and INTS12 regulation and expression in the human lung. *PLoS One* **8**, e74630 (2013).

**Cade *et al.*: WGS analyses of sleep-disordered breathing**

**Figure Legends**

**Figure 1. Regional plot of the rs35447033 association with AHI in European-ancestry individuals.** Joint WGS and imputed results are shown, using Build 38 coordinates.

**Figure 2. Regional plot of the rs28777 association with Average SpO<sub>2</sub> in European-ancestry individuals.** Joint WGS and imputed results are shown, using Build 38 coordinates.

Cade *et al.*: WGS analyses of sleep-disordered breathing

**Tables**

**Table 1. Sample description for WGS cohorts.**

| Population               | Cohort   | N     | Age           | Percent Female | BMI          | Apnea Hypopnea Index 3% | AHI (Percent < 5, 5 – 15, ≥ 15) | Average Desaturation | Average SpO <sub>2</sub> | Minimum SpO <sub>2</sub> | Percent Sleep Under 90% SpO <sub>2</sub> |
|--------------------------|----------|-------|---------------|----------------|--------------|-------------------------|---------------------------------|----------------------|--------------------------|--------------------------|------------------------------------------|
| African-American         | CFS*     | 505   | 38.65 (18.96) | 56.4           | 32.44 (9.48) | 6.85 (22.48)            | 43.4, 20.6, 36.0                | 3.62 (1.99)          | 94.49 (3.91)             | 84.76 (9.83)             | 4.79 (13.15)                             |
|                          | CHS      | 151   | 75.39 (4.35)  | 60.3           | 29.02 (5.08) | 9.60 (16.96)            | 28.5, 36.4, 35.1                | 2.70 (1.74)          | 94.82 (2.19)             | 85.74 (5.35)             | 3.39 (9.63)                              |
|                          | JHS      | 575   | 63.47 (10.94) | 64.9           | 31.8 (6.88)  | 10.69 (14.42)           | 24.7, 39.5, 35.8                | 3.54 (1.72)          | 94.77 (2.02)             | 84.30 (6.57)             | 2.97 (8.91)                              |
|                          | MESA     | 486   | 68.81 (9.07)  | 53.7           | 30.23 (5.68) | 12.67 (20.56)           | 22.4, 32.9, 44.7                | 3.42 (2.10)          | 94.46 (1.99)             | 83.32 (7.98)             | 3.89 (9.49)                              |
| East Asian-American      | MESA     | 229   | 67.89 (9.11)  | 49.8           | 24.28 (3.3)  | 14.96 (24.28)           | 21.8, 28.4, 49.8                | 3.72 (1.79)          | 94.92 (1.22)             | 83.23 (7.58)             | 2.25 (4.46)                              |
|                          | ARIC     | 1,028 | 62.28 (5.67)  | 53.1           | 28.72 (5.06) | 8.64 (15.62)            | 34.6, 32.4, 33.0                | 2.35 (1.29)          | 94.57 (1.84)             | 85.95 (5.93)             | 2.92 (9.24)                              |
| European-American        | CFS*     | 485   | 43.23 (19.49) | 50.5           | 30.81 (8.83) | 7.09 (21.90)            | 44.7, 19.4, 35.9                | 3.29 (1.86)          | 93.67 (3.59)             | 85.55 (9.33)             | 4.66 (11.87)                             |
|                          | CHS      | 557   | 77.90 (4.34)  | 54.2           | 27.25 (4.44) | 11.42 (15.54)           | 23.2, 38.1, 38.8                | 2.58 (1.34)          | 94.00 (2.00)             | 84.99 (5.67)             | 4.77 (12.28)                             |
|                          | FHS*     | 478   | 60.09 (8.54)  | 49.8           | 28.4 (5.06)  | 8.10 (14.28)            | 35.1, 35.1, 29.7                | 2.35 (1.27)          | 94.68 (2.04)             | 85.78 (6.25)             | 2.96 (9.18)                              |
|                          | MESA     | 698   | 68.53 (9.06)  | 53.2           | 27.91 (5.1)  | 12.18 (20.45)           | 21.6, 35.0, 43.4                | 3.11 (1.44)          | 93.96 (1.75)             | 83.49 (7.50)             | 4.27 (10.82)                             |
| Hispanic/Latino-American | HCHS/SOL | 2,339 | 46.27 (13.86) | 60.5           | 30.23 (6.44) | 2.03 (6.30)             | 68.9, 19.5, 11.6                | N/A                  | 96.42 (0.99)             | 87.04 (5.92)             | 0.88 (3.63)                              |
|                          | MESA     | 456   | 68.49 (9.27)  | 53.3           | 30.08 (5.46) | 16.31 (22.53)           | 17.1, 28.3, 54.6                | 3.62 (2.12)          | 94.33 (1.60)             | 81.59 (9.32)             | 3.80 (7.64)                              |

Seven studies contributed 7,988 individuals with WGS in TOPMed Freeze 6a and objectively measured phenotypes (1,717 African-Americans; 229 Asian-Americans; 3,246 European-Americans; 2,796 Hispanic/Latino-Americans). The overall sample had a mean age of 57.7 and was 56.1% female. Values are displayed as mean (SD), except for the skewed Apnea Hypopnea Index, which is displayed as median (IQR). Sample size N reflects individuals with non-missing AHI and covariate values. \*: Family cohort.

Cade *et al.*: WGS analyses of sleep-disordered breathing

**Table 2. Sample description for imputed genotype cohorts.**

| Population                       | Cohort       | N     | Age           | Percent Female | BMI           | Apnea Hypopnea Index 3% | AHI (Percent < 5, 5 – 15, ≥ 15) | Average Desaturation | Average SpO <sub>2</sub> | Minimum SpO <sub>2</sub> | Percent Sleep Under 90% SpO <sub>2</sub> |
|----------------------------------|--------------|-------|---------------|----------------|---------------|-------------------------|---------------------------------|----------------------|--------------------------|--------------------------|------------------------------------------|
| African-American                 | CFS*         | 225   | 35.46 (20.32) | 56.4           | 29.97 (10.09) | 3.99 (10.55)            | 55.1 / 23.1 / 21.8              | 2.90 (1.09)          | 94.65 (4.01)             | 88.17 (9.6)              | 5.20 (16.01)                             |
| European-American/<br>Australian | ARIC         | 631   | 62.74 (5.72)  | 49.4           | 29.15 (5.23)  | 9.15 (15.02)            | 29.3 / 37.9 / 32.8              | 2.50 (1.73)          | 94.32 (2.15)             | 85.17 (6.17)             | 4.12 (11.76)                             |
|                                  | CFS*         | 218   | 37.57 (18.66) | 56.9           | 28.76 (8.11)  | 3.4 (10.59)             | 57.8 / 22.5 / 19.7              | 2.30 (1.11)          | 94.09 (3.35)             | 88.81 (7.8)              | 3.26 (12.79)                             |
|                                  | CHS          | 365   | 77.44 (4.65)  | 64.9           | 27.10 (4.41)  | 10.50 (15.14)           | 25.8 / 39.2 / 35.1              | 2.63 (1.57)          | 94.41 (1.91)             | 84.87 (5.96)             | 3.93 (11.89)                             |
|                                  | FHS*         | 192   | 57.45 (9.68)  | 51.0           | 28.87 (5.16)  | 7.30 (14.38)            | 38.0 / 31.8 / 30.2              | 2.42 (1.51)          | 94.73 (1.80)             | 85.76 (5.46)             | 2.82 (8.38)                              |
|                                  | MrOS         | 2,181 | 76.65 (5.60)  | 0.0            | 27.21 (3.75)  | 13.00 (18.00)           | 18.9 / 36.1 / 45.0              | 3.54 (1.48)          | 93.85 (1.73)             | 84.39 (5.88)             | 4.40 (9.95)                              |
|                                  | WASHS        | 1,508 | 52.29 (13.71) | 40.9           | 31.84 (7.93)  | 7.24 (15.37)            | 40.1 / 31.1 / 28.8              | 3.56 (2.00)          | 94.56 (2.38)             | 84.61 (7.86)             | 5.44 (13.82)                             |
| Hispanic/<br>Latino-<br>American | HCHS/<br>SOL | 7,155 | 46.10 (13.81) | 57.8           | 29.68 (5.86)  | 2.00 (6.15)             | 69.1 / 19.3 / 11.6              | N/A                  | 96.46 (0.95)             | 87.06 (6.11)             | 0.83 (2.99)                              |
|                                  | Starr        | 782   | 52.34 (11.29) | 71.9           | 32.15 (6.78)  | 10.35 (17.18)           | 31.5 / 31.5 / 37.1              | N/A                  | 94.65 (2.09)             | 85.78 (7.50)             | 2.83 (8.79)                              |

Eight studies contributed 13,257 individuals with genomic data imputed with a TOPMed Freeze 5b reference panel and objectively measured phenotypes (225 African-Americans; 5,095 European-Americans; 7,937 Hispanic/Latino-Americans). ARIC, CFS, CHS, FHS, and HCHS/SOL imputed genomic data reflect individuals without available sequencing in TOPMed Freeze 6. The overall sample had a mean age of 53.7 and was 46.9% female. Values are displayed as mean (SD), except for the skewed Apnea Hypopnea Index, which is displayed as median (IQR). Sample size N reflects individuals with non-missing AHI and covariate values. \*: Family cohort.

Cade *et al.*: WGS analyses of sleep-disordered breathing

**Table 3. Lead gene-based multiple population results.**

| Phenotype        | Sex     | Gene              | B38 Positions               | P                     | Populations     | N     | Variants        |
|------------------|---------|-------------------|-----------------------------|-----------------------|-----------------|-------|-----------------|
| Avg Desaturation | All     | <i>ARMCX3</i>     | X:101,623,082 – 101,625,765 | $3.48 \times 10^{-8}$ | AA, AsA, EA, HA | 5,222 | 8, 5, 24, 9     |
|                  | All     | <i>ARMCX3-ASI</i> | X:101,623,082 – 101,625,153 | $3.49 \times 10^{-8}$ | AA, AsA, EA, HA | 5,222 | 7, 5, 23, 8     |
| Per90            | All     | <i>OR5K2</i>      | 3:98,497,633 – 98,498,634   | $2.55 \times 10^{-7}$ | AA, AsA, EA, HA | 7,986 | 4, 2, 1, 1      |
| Per90            | Females | <i>ZZEF1</i>      | 17:4,004,409 – 4,144,018    | $4.22 \times 10^{-7}$ | AA, AsA, EA, HA | 4,485 | 85, 16, 87, 131 |

Lead MMSKAT gene-based results meta-analyzed across populations within one order of magnitude of significance ( $p < 4.51 \times 10^{-8}$ ) are shown. The Populations column indicates which populations had filtered polymorphic variants available for testing, with the number listed in the Variants column. *ARMCX3-ASI* is a RNA gene that is anti-sense to the protein-coding *ARMCX3* gene. Full results for genes with  $p < 0.01$ , including Ensembl-derived gene biotypes and descriptions, are provided in Supplementary Table 4.

Cade *et al.*: WGS analyses of sleep-disordered breathing

**Table 4. Lead gene-based population-specific results.**

| Phenotype | Model      | Gene              | B38 Positions                | N     | Variants | Singletons | P                                       |
|-----------|------------|-------------------|------------------------------|-------|----------|------------|-----------------------------------------|
| Per90     | HA         | <i>LINC01277</i>  | 6:142,985,371 – 143,010,415  | 2,803 | 2        | 0          | $5.02 \times 10^{-8}$                   |
|           |            | <i>OR5K2</i>      | 3:98,497,633 – 98,498,634    | 2,803 | 1        | 0          | $2.74 \times 10^{-7}$                   |
|           | AA Females | <i>SI00A16*</i>   | 1:153,607,528 – 153,616,353  | 1,009 | 1        | 1          | $2.07 \times 10^{-7}$                   |
|           |            | <i>CSMD2-ASI</i>  | 1:33,867,977 – 33,885,456    | 1,009 | 1        | 1          | $2.07 \times 10^{-7}$                   |
|           | EA Females | <i>MRPS33</i>     | 7:141,006,422 – 141,014,911  | 1,702 | 9        | 8          | <b><math>1.22 \times 10^{-9}</math></b> |
|           |            | <i>LINC01811</i>  | 3:34,170,921 – 34,558,474    | 1,702 | 6        | 5          | $9.71 \times 10^{-8}$                   |
|           |            | <i>NELFCD*</i>    | 20:58,980,722 – 58,995,761   | 1,702 | 12       | 10         | $3.32 \times 10^{-7}$                   |
|           |            | <i>SLC22A8*</i>   | 11:62,988,399 – 63,015,986   | 1,702 | 3        | 3          | $3.58 \times 10^{-7}$                   |
|           | HA Females | <i>AL132709.1</i> | 14:101,077,452 – 101,077,578 | 1,660 | 2        | 0          | $1.41 \times 10^{-7}$                   |
|           |            | <i>EPHX4</i>      | 1:92,029,443 – 92,063,474    | 1,660 | 12       | 10         | $3.48 \times 10^{-7}$                   |
|           | HA Males   | <i>C16orf90</i>   | 16:3,493,483 – 3,496,479     | 1,143 | 6        | 3          | <b><math>1.36 \times 10^{-8}</math></b> |
|           |            | <i>TVP23B</i>     | 17:18,781,270 – 18,806,714   | 1,143 | 4        | 4          | $2.53 \times 10^{-7}$                   |
|           |            | <i>IPCEF1</i>     | 6:154,154,536 – 154,356,890  | 1,143 | 10       | 8          | $4.07 \times 10^{-7}$                   |

Lead MMSKAT gene-based population-specific associations within one order of magnitude of significance ( $p < 4.51 \times 10^{-8}$ ) are shown. The Variants column indicates the number of filtered polymorphic variants with minor allele frequency  $< 5\%$  available for testing, a portion of which were singletons. \*: Druggable gene [<sup>56,57</sup>]. Full results for genes with  $p < 0.01$ , including descriptions, are provided in Supplementary Table 5.



Cade *et al.*: WGS analyses of sleep-disordered breathing

Table 5. Lead single-variant analysis results.

| Region                                  | Phenotype            | Model    | SNP                    | WGS / Imputed N | CAF           | WGS Beta (SE)   | WGS P                 | Imputed Beta (SE) | Imputed P             | Combined Beta (SE) | Combined P                               |
|-----------------------------------------|----------------------|----------|------------------------|-----------------|---------------|-----------------|-----------------------|-------------------|-----------------------|--------------------|------------------------------------------|
| <i>2q12.1: IL18RAP</i>                  | Avg desaturation     | All      | rs77375846 C           | 4995 / 4838     | 0.028 – 0.129 | -0.152 (0.049)  | $1.87 \times 10^{-3}$ | -0.264 (0.049)    | $5.97 \times 10^{-8}$ | -0.208 (0.035)     | <b><math>1.57 \times 10^{-9}</math></b>  |
| <i>2q33.3: PPIAP68</i>                  | Avg desaturation     | All      | rs60132122 T           | 5222 / 4838     | 0.308 – 0.637 | 0.062 (0.031)   | 0.043                 | 0.195 (0.034)     | $6.26 \times 10^{-9}$ | 0.122 (0.023)      | $6.49 \times 10^{-8}$                    |
| <i>11q12.2: MS4A15</i>                  | Avg SpO <sub>2</sub> | All      | rs4939452 C            | 7929 / 13197    | 0.347 – 0.524 | 0.066 (0.023)   | $4.34 \times 10^{-3}$ | 0.063 (0.014)     | $3.29 \times 10^{-6}$ | 0.064 (0.012)      | $4.87 \times 10^{-8}$                    |
| <i>18q12.3: LINC00907</i>               | Avg SpO <sub>2</sub> | All      | rs187860354 G          | 4500 / 7391     | 0.006 – 0.022 | 0.442 (0.146)   | $2.36 \times 10^{-3}$ | 0.432 (0.097)     | $8.53 \times 10^{-6}$ | 0.436 (0.081)      | $7.04 \times 10^{-8}$                    |
| <i>2q12.1: IL18RAP</i>                  | Min SpO <sub>2</sub> | All      | rs138895820 G          | 7705 / 13194    | 0.025 – 0.131 | 0.510 (0.184)   | $5.58 \times 10^{-3}$ | 0.654 (0.128)     | $3.36 \times 10^{-7}$ | 0.607 (0.105)      | <b><math>7.93 \times 10^{-9}</math></b>  |
| <i>10p12.31: NEBL</i>                   | Min SpO <sub>2</sub> | Females  | rs11453507 CA          | 4450 / 6202     | 0.138 – 0.514 | 0.651 (0.140)   | $3.34 \times 10^{-6}$ | 0.338 (0.102)     | $8.63 \times 10^{-4}$ | 0.446 (0.082)      | $5.73 \times 10^{-8}$                    |
| <i>12q21.2: LINC024064</i>              | Min SpO <sub>2</sub> | Females  | rs2176909 T            | 4450 / 6202     | 0.724 – 0.930 | 0.828 (0.157)   | $1.38 \times 10^{-7}$ | 0.319 (0.116)     | $5.77 \times 10^{-3}$ | 0.498 (0.093)      | $9.06 \times 10^{-8}$                    |
| <i>5p13.3: C5orf22</i>                  | AHI                  | Males    | rs10940956 A           | 3502 / 7043     | 0.470 – 0.759 | 0.930 (0.422)   | $2.74 \times 10^{-2}$ | 1.430 (0.269)     | $1.09 \times 10^{-7}$ | 1.285 (0.227)      | $1.48 \times 10^{-8}$                    |
| <i>9p22.1: DENND4C</i>                  | AHI                  | AA       | rs111654000 A          | 1717 / 225      | 0.016 – 0.018 | -11.240 (2.268) | $7.18 \times 10^{-7}$ | -18.110 (6.724)   | $7.07 \times 10^{-3}$ | -11.942 (2.149)    | $2.74 \times 10^{-8}$                    |
| <i>1q31.2: AL954650.1</i>               | AHI                  | AA       | chr1:191965014_G/A A   | 1717 / 225      | 0.286 – 0.301 | 3.078 (0.641)   | $1.56 \times 10^{-6}$ | 5.080 (1.759)     | $3.88 \times 10^{-3}$ | 3.313 (0.602)      | $3.75 \times 10^{-8}$                    |
| <i>8p12: AC068672.1, NRG1</i>           | AHI                  | EA       | rs35447033 T           | 3246 / 5095     | 0.060 – 0.094 | 2.247 (0.621)   | $2.95 \times 10^{-4}$ | 2.453 (0.521)     | $2.54 \times 10^{-6}$ | 2.368 (0.399)      | <b><math>3.02 \times 10^{-9}</math></b>  |
| <i>5p13.2: SLC45A2</i>                  | Avg SpO <sub>2</sub> | EA       | rs28777 A              | 3201 / 5024     | 0.885 – 0.969 | -0.526 (0.133)  | $8.00 \times 10^{-5}$ | -0.454 (0.096)    | $2.23 \times 10^{-6}$ | -0.478 (0.078)     | <b><math>8.08 \times 10^{-10}</math></b> |
| <i>1q32.1: ATP2B4</i>                   | Avg SpO <sub>2</sub> | HA       | rs116133558 T          | 2803 / 7956     | 0.006 – 0.014 | 0.371 (0.120)   | $2.08 \times 10^{-3}$ | 0.294 (0.062)     | $2.15 \times 10^{-6}$ | 0.310 (0.055)      | $1.88 \times 10^{-8}$                    |
| <i>1q23.3: intergenic (RNU6-755P)</i>   | Min SpO <sub>2</sub> | HA       | rs140743827 A          | 2803, 7174      | 0.017 – 0.020 | -1.502 (0.593)  | $1.13 \times 10^{-2}$ | -1.770 (0.367)    | $1.42 \times 10^{-6}$ | -1.696 (0.312)     | $5.51 \times 10^{-8}$                    |
| <i>1q32.1: ATP2B4</i>                   | Per90                | HA       | rs116133558 T          | 2803, 7956      | 0.006 – 0.014 | -1.005 (0.450)  | $2.54 \times 10^{-2}$ | -1.218 (0.207)    | $4.15 \times 10^{-9}$ | -1.181 (0.188)     | <b><math>3.51 \times 10^{-10}</math></b> |
| <i>11p11.2: intergenic (AC104010.1)</i> | Avg SpO <sub>2</sub> | HA males | chr11:44652095_T C/T T | 1143 / 3024     | 0.007 – 0.008 | 0.686 (0.248)   | $5.65 \times 10^{-3}$ | 0.710 (0.154)     | $3.83 \times 10^{-6}$ | 0.703 (0.131)      | $7.25 \times 10^{-8}$                    |
| <i>10q22.1: HK1</i>                     | Min SpO <sub>2</sub> | EA males | rs17476364 C           | 1523 / 3650     | 0.072 – 0.115 | 1.215 (0.392)   | $1.94 \times 10^{-3}$ | 1.099 (0.235)     | $2.81 \times 10^{-6}$ | 1.129 (0.201)      | $2.01 \times 10^{-8}$                    |
| <i>8q23.2: KCNV1</i>                    | Min SpO <sub>2</sub> | EA males | rs58365105 A           | 1523, 3650      | 0.007 – 0.026 | -2.878 (0.864)  | $8.65 \times 10^{-4}$ | -2.406 (0.540)    | $8.36 \times 10^{-6}$ | -2.539 (0.458)     | $2.96 \times 10^{-8}$                    |
| <i>2q35: AC019211.1</i>                 | Per90                | EA males | chr2:220369683_G/A A   | 1540, 187       | 0.005 – 0.006 | 12.280 (2.431)  | $4.38 \times 10^{-7}$ | 17.505 (7.989)    | $2.85 \times 10^{-2}$ | 12.723 (2.326)     | $4.48 \times 10^{-8}$                    |

**Cade *et al.*: WGS analyses of sleep-disordered breathing**

Lead EMMAX single-variant associations within one order of magnitude of significance (combined  $p < 1.00 \times 10^{-8}$ ) and with replication evidence ( $p < 0.05$ ) are shown. Full results for all variants in each locus with  $p < 1.00 \times 10^{-7}$ , including additional associations with secondary models, and metadata and annotations, are provided in Supplementary Table 6.

Cade *et al.*: WGS analyses of sleep-disordered breathing

**Table 6. Transcription factor binding site interval enrichment results.**

| Phenotype                | Transcription Factor | # Observed Overlap | # Expected Overlap | -log10 (E-value) |
|--------------------------|----------------------|--------------------|--------------------|------------------|
| AHI                      | <i>FOXP2</i>         | 588                | 36.20              | 473.99           |
|                          | <i>KDM6B</i>         | 630                | 51.58              | 435.29           |
|                          | <i>THAP1</i>         | 505                | 31.89              | 402.07           |
|                          | <i>KLF9</i>          | 745                | 91.81              | 395.52           |
|                          | <i>TP63</i>          | 997                | 182.22             | 383.85           |
| Average Desaturation     | <i>FOXP2</i>         | 493                | 22.32              | 460.00           |
|                          | <i>THAP1</i>         | 439                | 19.55              | 412.76           |
|                          | <i>UBTF</i>          | 489                | 28.20              | 407.50           |
|                          | <i>TP63</i>          | 788                | 109.36             | 382.89           |
|                          | <i>KDM6B</i>         | 482                | 30.98              | 380.39           |
| Average SpO <sub>2</sub> | <i>FOXP2</i>         | 582                | 35.87              | 468.89           |
|                          | <i>KDM6B</i>         | 613                | 51.21              | 418.65           |
|                          | <i>EGR1</i>          | 664                | 66.76              | 404.83           |
|                          | <i>UBTF</i>          | 574                | 46.35              | 399.91           |
|                          | <i>KDM4B</i>         | 489                | 29.56              | 398.10           |
| Min SpO <sub>2</sub>     | <i>FOXP2</i>         | 561                | 35.57              | 445.57           |
|                          | <i>THAP1</i>         | 515                | 31.32              | 417.89           |
|                          | <i>KDM6B</i>         | 569                | 50.87              | 373.41           |
|                          | <i>UBTF</i>          | 536                | 45.99              | 360.56           |
|                          | <i>EGR1</i>          | 602                | 66.25              | 346.03           |
| Per90                    | <i>FOXP2</i>         | 689                | 39.05              | 578.42           |
|                          | <i>KDM6B</i>         | 739                | 54.79              | 539.69           |
|                          | <i>TP63</i>          | 1199               | 193.28             | 515.44           |
|                          | <i>THAP1</i>         | 607                | 34.47              | 509.33           |
|                          | <i>EGR1</i>          | 786                | 72.09              | 507.27           |

250 base-pair sliding window coordinates with association  $p < 0.01$  were queried for interval enrichment of ChIP-seq derived transcription factor binding sites using the ReMap annotation tool. ChIP-seq coordinates were required to have >50% overlap with a sliding window interval. ReMap-derived expected overlaps are obtained from the equivalent number of similarly-sized random regions. E-value indicates the expected value, with a higher log-transformed value indicating greater enrichment. Full results are provided in Supplementary Table 12.

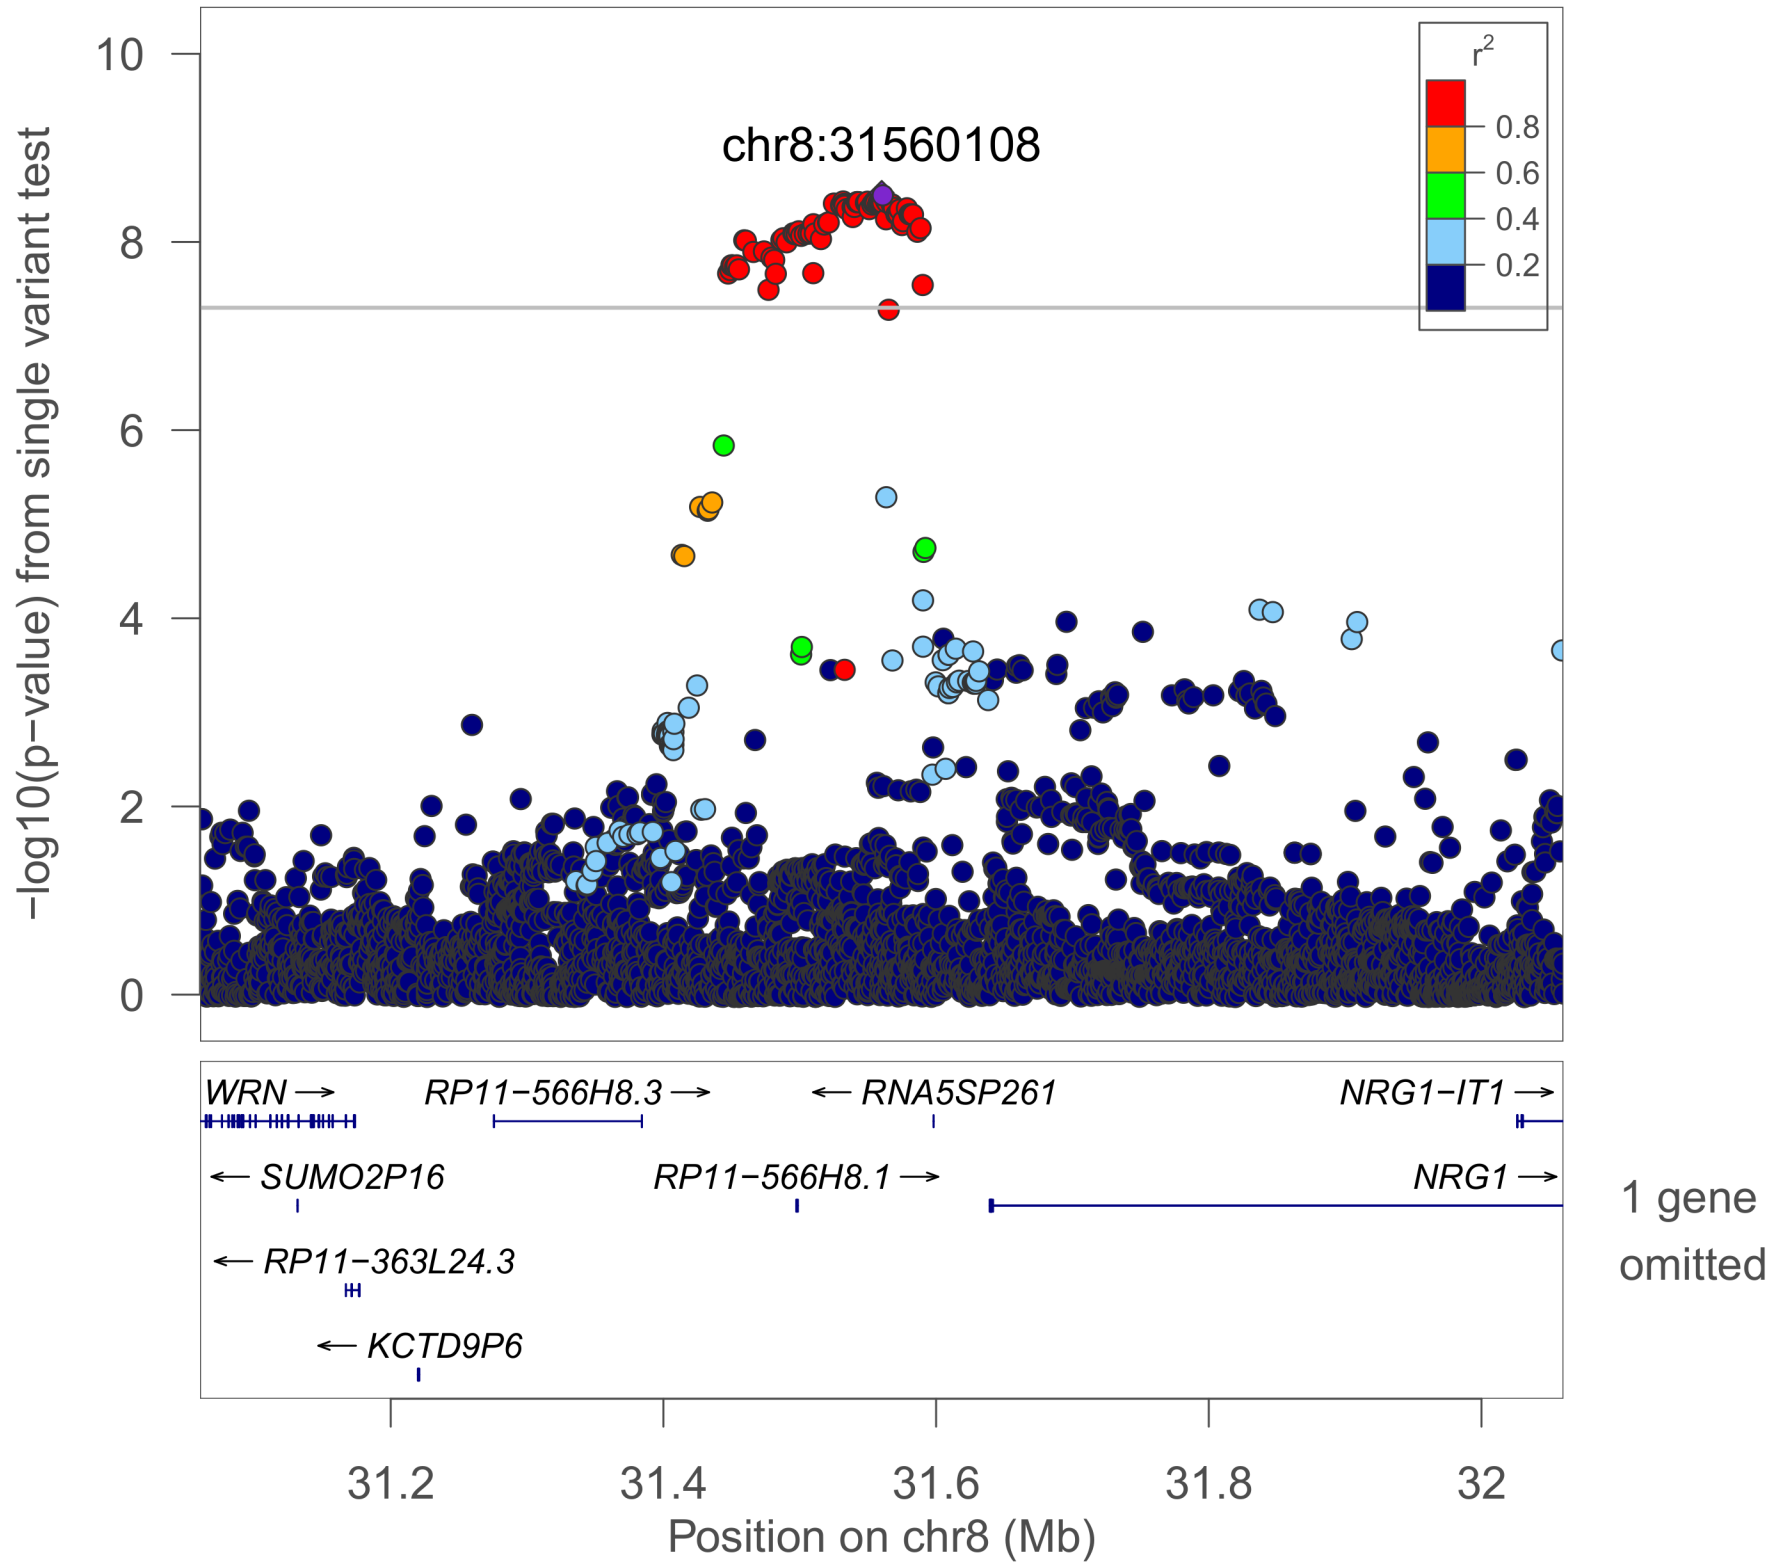

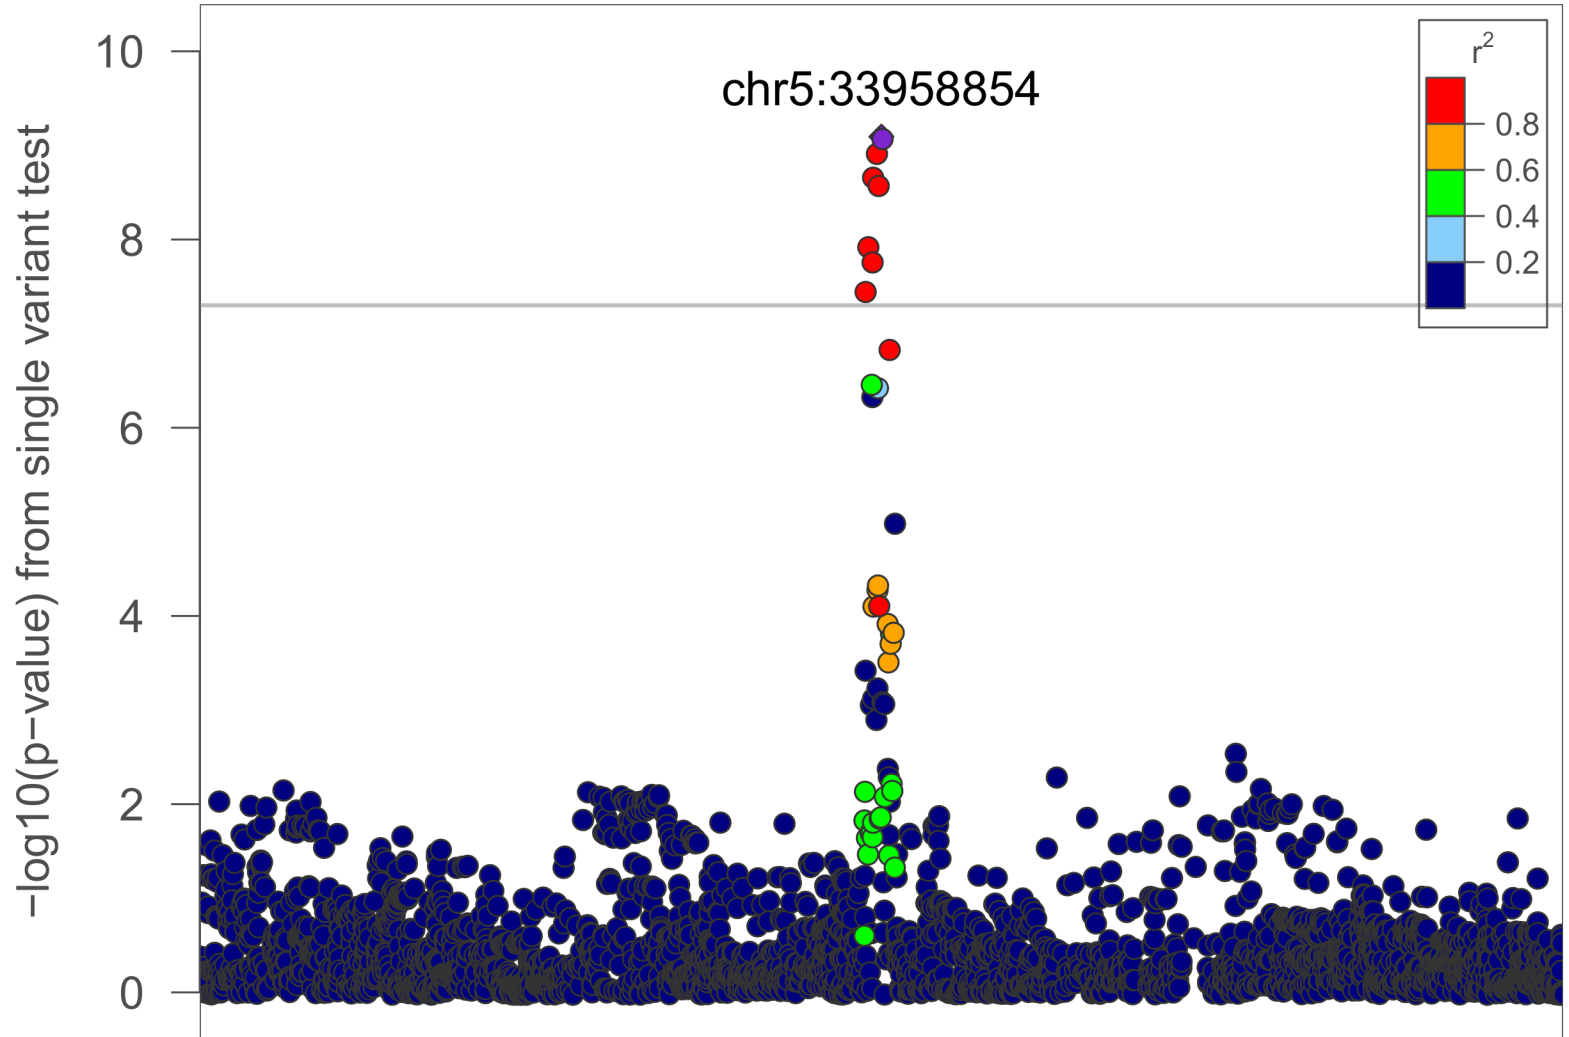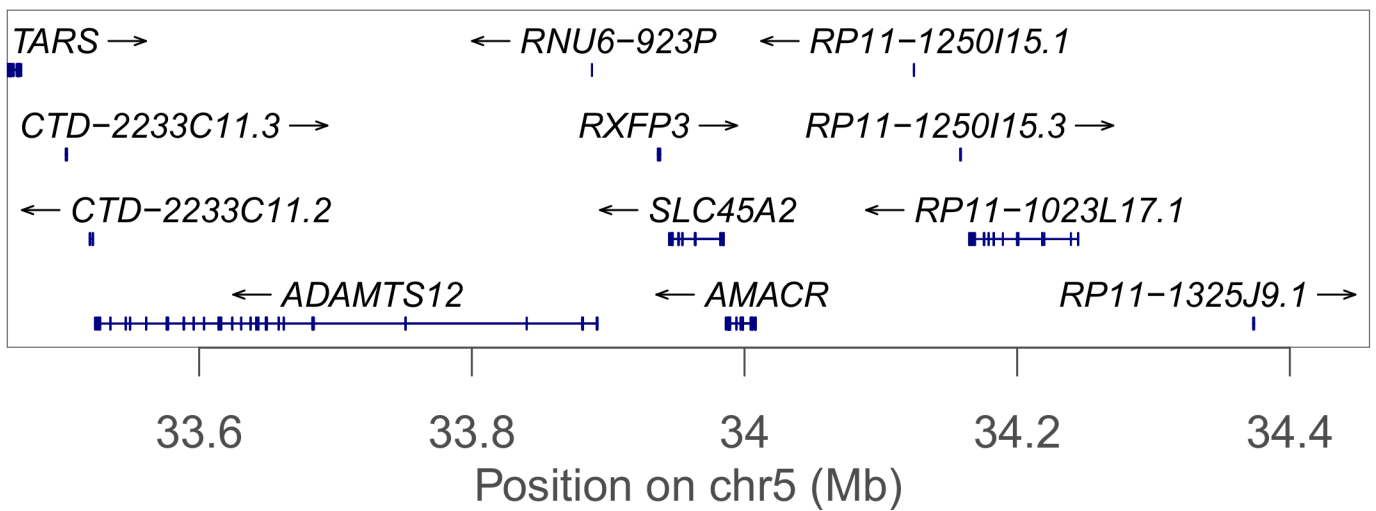

Source: https://www.biorxiv.org/content/biorxiv/early/2019/06/03/652966.full.pdf
